# Supplementary material
Source: HighWire-hosted journal article supplement (https://bmjopen.bmj.com/content/8/5/e022079)
Supplement: inline-supplementary-material-1 [file inline-supplementary-material-1.pdf]

| country | type           | data | unit          | month    | year | subject                              |
|---------|----------------|------|---------------|----------|------|--------------------------------------|
| Finland | Speciality     | 8367 | number.patien | december | 2007 | SURGERY                              |
| Finland | Speciality     | 2783 | number.patien | december | 2007 | OPHTHALMOLOGY                        |
| Finland | Speciality     | 2247 | number.patien | december | 2007 | OTORHINOLARYNGOLOGY                  |
| Finland | Speciality     | 2193 | number.patien | december | 2007 | INTERNAL MEDICINE                    |
| Finland | Speciality     | 940  | number.patien | december | 2007 | NEUROLOGY                            |
| Finland | Speciality     | 880  | number.patien | december | 2007 | OTHER                                |
| Finland | Speciality     | 480  | number.patien | december | 2007 | ORAL AND MAXILLOFACIAL SURGERY       |
| Finland | Speciality     | 475  | number.patien | december | 2007 | DERMATOLOGY AND VENEREOLOGY          |
| Finland | Speciality     | 1169 | number.patien | december | 2007 | OBSTETRICS AND GYNAECOLOGY           |
| Finland | Speciality     | 696  | number.patien | december | 2007 | RESPIRATORY MEDICINE                 |
| Finland | Speciality     | 540  | number.patien | december | 2007 | PAEDIATRICS                          |
| Finland | Speciality     | 129  | number.patien | december | 2007 | NEUROSURGERY                         |
| Finland | Speciality     | 193  | number.patien | december | 2007 | PSYCHIATRY                           |
| Finland | Speciality     | 102  | number.patien | december | 2007 | ANAESTHESIOLOGY                      |
| Finland | Speciality     | 88   | number.patien | december | 2007 | ADOLESCENT AND CHILD PSYCHIATRY      |
| Finland | Speciality     | 122  | number.patien | december | 2007 | CHILD NEUROLOGY                      |
| Finland | Speciality     | 48   | number.patien | december | 2007 | PHONiatrics                          |
| Finland | Speciality     | 40   | number.patien | december | 2007 | ONCOLOGY AND RADIOLOGY               |
| Finland | Process        | 4282 | number.patien | december | 2007 | Orthopaedics                         |
| Finland | Process        | 587  | number.patien | december | 2007 | Hand surgery                         |
| Finland | Process        | 1339 | number.patien | december | 2007 | Surgery                              |
| Finland | Process        | 551  | number.patien | december | 2007 | Gastroenterological surgery          |
| Finland | Process        | 578  | number.patien | december | 2007 | Urology                              |
| Finland | Process        | 410  | number.patien | december | 2007 | Vascular surgery                     |
| Finland | Process        | 263  | number.patien | december | 2007 | Plastic surgery                      |
| Finland | Process        | 191  | number.patien | december | 2007 | Paediatric surgery                   |
| Finland | Process        | 161  | number.patien | december | 2007 | General surgery                      |
| Finland | Process        | 5    | number.patien | december | 2007 | Cardiothoracic surgery               |
| Finland | Internal.medic | 565  | number.patien | december | 2007 | Cardiology                           |
| Finland | Internal.medic | 982  | number.patien | december | 2007 | Internal medicine                    |
| Finland | Internal.medic | 257  | number.patien | december | 2007 | Gastroenterology (internal medicine) |
| Finland | Internal.medic | 186  | number.patien | december | 2007 | Endocrinology (internal medicine)    |

|         |                |      |               |          |      |                                 |
|---------|----------------|------|---------------|----------|------|---------------------------------|
| Finland | Internal.medic | 143  | number.patien | december | 2007 | Rheumatology                    |
| Finland | Internal.medic | 30   | number.patien | december | 2007 | Nephrology                      |
| Finland | Internal.medic | 18   | number.patien | december | 2007 | Haematology                     |
| Finland | Internal.medic | 2    | number.patien | december | 2007 | Geriatrics (internal medicine)  |
| Finland | Internal.medic | 10   | number.patien | december | 2007 | Infectious diseases             |
| Finland | Internal.medic | 0    | number.patien | december | 2007 | Allergology (internal medicine) |
| Finland | Speciality     | 6050 | number.patien | april    | 2008 | SURGERY                         |
| Finland | Speciality     | 2659 | number.patien | april    | 2008 | OPHTHALMOLOGY                   |
| Finland | Speciality     | 2628 | number.patien | april    | 2008 | OTORHINOLARYNGOLOGY             |
| Finland | Speciality     | 2013 | number.patien | april    | 2008 | INTERNAL MEDICINE               |
| Finland | Speciality     | 755  | number.patien | april    | 2008 | NEUROLOGY                       |
| Finland | Speciality     | 732  | number.patien | april    | 2008 | OTHER                           |
| Finland | Speciality     | 459  | number.patien | april    | 2008 | ORAL AND MAXILLOFACIAL SURGERY  |
| Finland | Speciality     | 687  | number.patien | april    | 2008 | DERMATOLOGY AND VENEREOLOGY     |
| Finland | Speciality     | 1235 | number.patien | april    | 2008 | OBSTETRICS AND GYNAECOLOGY      |
| Finland | Speciality     | 600  | number.patien | april    | 2008 | RESPIRATORY MEDICINE            |
| Finland | Speciality     | 464  | number.patien | april    | 2008 | PAEDIATRICS                     |
| Finland | Speciality     | 43   | number.patien | april    | 2008 | NEUROSURGERY                    |
| Finland | Speciality     | 86   | number.patien | april    | 2008 | PSYCHIATRY                      |
| Finland | Speciality     | 45   | number.patien | april    | 2008 | ANAESTHESIOLOGY                 |
| Finland | Speciality     | 51   | number.patien | april    | 2008 | ADOLESCENT AND CHILD PSYCHIATRY |
| Finland | Speciality     | 70   | number.patien | april    | 2008 | CHILD NEUROLOGY                 |
| Finland | Speciality     | 310  | number.patien | april    | 2008 | PHONiatrics                     |
| Finland | Speciality     | 35   | number.patien | april    | 2008 | ONCOLOGY AND RADIOLOGY          |
| Finland | Process        | 2883 | number.patien | april    | 2008 | Orthopaedics                    |
| Finland | Process        | 245  | number.patien | april    | 2008 | Hand surgery                    |
| Finland | Process        | 1004 | number.patien | april    | 2008 | Surgery                         |
| Finland | Process        | 724  | number.patien | april    | 2008 | Gastroenterological surgery     |
| Finland | Process        | 478  | number.patien | april    | 2008 | Urology                         |
| Finland | Process        | 363  | number.patien | april    | 2008 | Vascular surgery                |
| Finland | Process        | 133  | number.patien | april    | 2008 | Plastic surgery                 |
| Finland | Process        | 129  | number.patien | april    | 2008 | Paediatric surgery              |
| Finland | Process        | 79   | number.patien | april    | 2008 | General surgery                 |

|         |                |       |                      |      |                                      |
|---------|----------------|-------|----------------------|------|--------------------------------------|
| Finland | Process        | 12    | number.patien april  | 2008 | Cardiothoracic surgery               |
| Finland | Internal.medic | 566   | number.patien april  | 2008 | Cardiology                           |
| Finland | Internal.medic | 810   | number.patien april  | 2008 | Internal medicine                    |
| Finland | Internal.medic | 240   | number.patien april  | 2008 | Gastroenterology (internal medicine) |
| Finland | Internal.medic | 128   | number.patien april  | 2008 | Endocrinology (internal medicine)    |
| Finland | Internal.medic | 223   | number.patien april  | 2008 | Rheumatology                         |
| Finland | Internal.medic | 25    | number.patien april  | 2008 | Nephrology                           |
| Finland | Internal.medic | 12    | number.patien april  | 2008 | Haematology                          |
| Finland | Internal.medic | 1     | number.patien april  | 2008 | Geriatrics (internal medicine)       |
| Finland | Internal.medic | 7     | number.patien april  | 2008 | Infectious diseases                  |
| Finland | Internal.medic | 1     | number.patien april  | 2008 | Allergology (internal medicine)      |
| Finland | Speciality     | 11321 | number.patien august | 2008 | SURGERY                              |
| Finland | Speciality     | 3342  | number.patien august | 2008 | OPHTHALMOLOGY                        |
| Finland | Speciality     | 3427  | number.patien august | 2008 | OTORHINOLARYNGOLOGY                  |
| Finland | Speciality     | 2906  | number.patien august | 2008 | INTERNAL MEDICINE                    |
| Finland | Speciality     | 927   | number.patien august | 2008 | NEUROLOGY                            |
| Finland | Speciality     | 973   | number.patien august | 2008 | OTHER                                |
| Finland | Speciality     | 547   | number.patien august | 2008 | ORAL AND MAXILLOFACIAL SURGERY       |
| Finland | Speciality     | 656   | number.patien august | 2008 | DERMATOLOGY AND VENEREOLOGY          |
| Finland | Speciality     | 1355  | number.patien august | 2008 | OBSTETRICS AND GYNAECOLOGY           |
| Finland | Speciality     | 783   | number.patien august | 2008 | RESPIRATORY MEDICINE                 |
| Finland | Speciality     | 565   | number.patien august | 2008 | PAEDIATRICS                          |
| Finland | Speciality     | 149   | number.patien august | 2008 | NEUROSURGERY                         |
| Finland | Speciality     | 148   | number.patien august | 2008 | PSYCHIATRY                           |
| Finland | Speciality     | 65    | number.patien august | 2008 | ANAESTHESIOLOGY                      |
| Finland | Speciality     | 137   | number.patien august | 2008 | ADOLESCENT AND CHILD PSYCHIATRY      |
| Finland | Speciality     | 172   | number.patien august | 2008 | CHILD NEUROLOGY                      |
| Finland | Speciality     | 121   | number.patien august | 2008 | PHONiatrics                          |
| Finland | Speciality     | 46    | number.patien august | 2008 | ONCOLOGY AND RADIOLOGY               |
| Finland | Process        | 6200  | number.patien august | 2008 | Orthopaedics                         |
| Finland | Process        | 735   | number.patien august | 2008 | Hand surgery                         |
| Finland | Process        | 969   | number.patien august | 2008 | Surgery                              |
| Finland | Process        | 1166  | number.patien august | 2008 | Gastroenterological surgery          |

|         |                |      |               |          |      |                                      |
|---------|----------------|------|---------------|----------|------|--------------------------------------|
| Finland | Process        | 769  | number.patien | august   | 2008 | Urology                              |
| Finland | Process        | 542  | number.patien | august   | 2008 | Vascular surgery                     |
| Finland | Process        | 324  | number.patien | august   | 2008 | Plastic surgery                      |
| Finland | Process        | 294  | number.patien | august   | 2008 | Paediatric surgery                   |
| Finland | Process        | 306  | number.patien | august   | 2008 | General surgery                      |
| Finland | Process        | 16   | number.patien | august   | 2008 | Cardiothoracic surgery               |
| Finland | Internal.medic | 797  | number.patien | august   | 2008 | Cardiology                           |
| Finland | Internal.medic | 987  | number.patien | august   | 2008 | Internal medicine                    |
| Finland | Internal.medic | 445  | number.patien | august   | 2008 | Gastroenterology (internal medicine) |
| Finland | Internal.medic | 310  | number.patien | august   | 2008 | Endocrinology (internal medicine)    |
| Finland | Internal.medic | 281  | number.patien | august   | 2008 | Rheumatology                         |
| Finland | Internal.medic | 29   | number.patien | august   | 2008 | Nephrology                           |
| Finland | Internal.medic | 18   | number.patien | august   | 2008 | Haematology                          |
| Finland | Internal.medic | 1    | number.patien | august   | 2008 | Geriatrics (internal medicine)       |
| Finland | Internal.medic | 16   | number.patien | august   | 2008 | Infectious diseases                  |
| Finland | Internal.medic | 22   | number.patien | august   | 2008 | Allergology (internal medicine)      |
| Finland | Speciality     | 7571 | number.patien | december | 2008 | SURGERY                              |
| Finland | Speciality     | 2158 | number.patien | december | 2008 | OPHTHALMOLOGY                        |
| Finland | Speciality     | 1883 | number.patien | december | 2008 | OTORHINOLARYNGOLOGY                  |
| Finland | Speciality     | 1645 | number.patien | december | 2008 | INTERNAL MEDICINE                    |
| Finland | Speciality     | 676  | number.patien | december | 2008 | NEUROLOGY                            |
| Finland | Speciality     | 795  | number.patien | december | 2008 | OTHER                                |
| Finland | Speciality     | 322  | number.patien | december | 2008 | ORAL AND MAXILLOFACIAL SURGERY       |
| Finland | Speciality     | 508  | number.patien | december | 2008 | DERMATOLOGY AND VENEREOLOGY          |
| Finland | Speciality     | 674  | number.patien | december | 2008 | OBSTETRICS AND GYNAECOLOGY           |
| Finland | Speciality     | 396  | number.patien | december | 2008 | RESPIRATORY MEDICINE                 |
| Finland | Speciality     | 295  | number.patien | december | 2008 | PAEDIATRICS                          |
| Finland | Speciality     | 90   | number.patien | december | 2008 | NEUROSURGERY                         |
| Finland | Speciality     | 114  | number.patien | december | 2008 | PSYCHIATRY                           |
| Finland | Speciality     | 120  | number.patien | december | 2008 | ANAESTHESIOLOGY                      |
| Finland | Speciality     | 118  | number.patien | december | 2008 | ADOLESCENT AND CHILD PSYCHIATRY      |
| Finland | Speciality     | 103  | number.patien | december | 2008 | CHILD NEUROLOGY                      |
| Finland | Speciality     | 134  | number.patien | december | 2008 | PHONiatrics                          |

|         |                |                             |                                           |
|---------|----------------|-----------------------------|-------------------------------------------|
| Finland | Speciality     | 106 number.patien december  | 2008 ONCOLOGY AND RADIOLOGY               |
| Finland | Process        | 4609 number.patien december | 2008 Orthopaedics                         |
| Finland | Process        | 524 number.patien december  | 2008 Hand surgery                         |
| Finland | Process        | 340 number.patien december  | 2008 Surgery                              |
| Finland | Process        | 538 number.patien december  | 2008 Gastroenterological surgery          |
| Finland | Process        | 376 number.patien december  | 2008 Urology                              |
| Finland | Process        | 416 number.patien december  | 2008 Vascular surgery                     |
| Finland | Process        | 295 number.patien december  | 2008 Plastic surgery                      |
| Finland | Process        | 203 number.patien december  | 2008 Paediatric surgery                   |
| Finland | Process        | 245 number.patien december  | 2008 General surgery                      |
| Finland | Process        | 25 number.patien december   | 2008 Cardiothoracic surgery               |
| Finland | Internal.medic | 464 number.patien december  | 2008 Cardiology                           |
| Finland | Internal.medic | 465 number.patien december  | 2008 Internal medicine                    |
| Finland | Internal.medic | 223 number.patien december  | 2008 Gastroenterology (internal medicine) |
| Finland | Internal.medic | 239 number.patien december  | 2008 Endocrinology (internal medicine)    |
| Finland | Internal.medic | 193 number.patien december  | 2008 Rheumatology                         |
| Finland | Internal.medic | 13 number.patien december   | 2008 Nephrology                           |
| Finland | Internal.medic | 23 number.patien december   | 2008 Haematology                          |
| Finland | Internal.medic | 0 number.patien december    | 2008 Geriatrics (internal medicine)       |
| Finland | Internal.medic | 14 number.patien december   | 2008 Infectious diseases                  |
| Finland | Internal.medic | 11 number.patien december   | 2008 Allergology (internal medicine)      |
| Finland | Speciality     | 6954 number.patien april    | 2009 SURGERY                              |
| Finland | Speciality     | 2343 number.patien april    | 2009 OPHTHALMOLOGY                        |
| Finland | Speciality     | 1679 number.patien april    | 2009 OTORHINOLARYNGOLOGY                  |
| Finland | Speciality     | 1523 number.patien april    | 2009 INTERNAL MEDICINE                    |
| Finland | Speciality     | 580 number.patien april     | 2009 NEUROLOGY                            |
| Finland | Speciality     | 689 number.patien april     | 2009 OTHER                                |
| Finland | Speciality     | 386 number.patien april     | 2009 ORAL AND MAXILLOFACIAL SURGERY       |
| Finland | Speciality     | 494 number.patien april     | 2009 DERMATOLOGY AND VENEREOLOGY          |
| Finland | Speciality     | 721 number.patien april     | 2009 OBSTETRICS AND GYNAECOLOGY           |
| Finland | Speciality     | 463 number.patien april     | 2009 RESPIRATORY MEDICINE                 |
| Finland | Speciality     | 264 number.patien april     | 2009 PAEDIATRICS                          |
| Finland | Speciality     | 128 number.patien april     | 2009 NEUROSURGERY                         |

|         |                |       |               |        |      |                                      |
|---------|----------------|-------|---------------|--------|------|--------------------------------------|
| Finland | Speciality     | 65    | number.patien | april  | 2009 | PSYCHIATRY                           |
| Finland | Speciality     | 55    | number.patien | april  | 2009 | ANAESTHESIOLOGY                      |
| Finland | Speciality     | 89    | number.patien | april  | 2009 | ADOLESCENT AND CHILD PSYCHIATRY      |
| Finland | Speciality     | 134   | number.patien | april  | 2009 | CHILD NEUROLOGY                      |
| Finland | Speciality     | 118   | number.patien | april  | 2009 | PHONiatrics                          |
| Finland | Speciality     | 32    | number.patien | april  | 2009 | ONCOLOGY AND RADIOLOGY               |
| Finland | Process        | 4309  | number.patien | april  | 2009 | Orthopaedics                         |
| Finland | Process        | 545   | number.patien | april  | 2009 | Hand surgery                         |
| Finland | Process        | 343   | number.patien | april  | 2009 | Surgery                              |
| Finland | Process        | 514   | number.patien | april  | 2009 | Gastroenterological surgery          |
| Finland | Process        | 455   | number.patien | april  | 2009 | Urology                              |
| Finland | Process        | 161   | number.patien | april  | 2009 | Vascular surgery                     |
| Finland | Process        | 208   | number.patien | april  | 2009 | Plastic surgery                      |
| Finland | Process        | 128   | number.patien | april  | 2009 | Paediatric surgery                   |
| Finland | Process        | 275   | number.patien | april  | 2009 | General surgery                      |
| Finland | Process        | 16    | number.patien | april  | 2009 | Cardiothoracic surgery               |
| Finland | Internal.medic | 454   | number.patien | april  | 2009 | Cardiology                           |
| Finland | Internal.medic | 413   | number.patien | april  | 2009 | Internal medicine                    |
| Finland | Internal.medic | 199   | number.patien | april  | 2009 | Gastroenterology (internal medicine) |
| Finland | Internal.medic | 293   | number.patien | april  | 2009 | Endocrinology (internal medicine)    |
| Finland | Internal.medic | 110   | number.patien | april  | 2009 | Rheumatology                         |
| Finland | Internal.medic | 9     | number.patien | april  | 2009 | Nephrology                           |
| Finland | Internal.medic | 18    | number.patien | april  | 2009 | Haematology                          |
| Finland | Internal.medic | 1     | number.patien | april  | 2009 | Geriatrics (internal medicine)       |
| Finland | Internal.medic | 5     | number.patien | april  | 2009 | Infectious diseases                  |
| Finland | Internal.medic | 21    | number.patien | april  | 2009 | Allergology (internal medicine)      |
| Finland | Speciality     | 12628 | number.patien | august | 2009 | SURGERY                              |
| Finland | Speciality     | 3610  | number.patien | august | 2009 | OPHTHALMOLOGY                        |
| Finland | Speciality     | 2502  | number.patien | august | 2009 | OTORHINOLARYNGOLOGY                  |
| Finland | Speciality     | 1810  | number.patien | august | 2009 | INTERNAL MEDICINE                    |
| Finland | Speciality     | 960   | number.patien | august | 2009 | NEUROLOGY                            |
| Finland | Speciality     | 818   | number.patien | august | 2009 | OTHER                                |
| Finland | Speciality     | 514   | number.patien | august | 2009 | ORAL AND MAXILLOFACIAL SURGERY       |

|         |                |                              |                                           |
|---------|----------------|------------------------------|-------------------------------------------|
| Finland | Speciality     | 540 number.patier august     | 2009 DERMATOLOGY AND VENEREOLOGY          |
| Finland | Speciality     | 1271 number.patier august    | 2009 OBSTETRICS AND GYNAECOLOGY           |
| Finland | Speciality     | 548 number.patier august     | 2009 RESPIRATORY MEDICINE                 |
| Finland | Speciality     | 410 number.patier august     | 2009 PAEDIATRICS                          |
| Finland | Speciality     | 243 number.patier august     | 2009 NEUROSURGERY                         |
| Finland | Speciality     | 530 number.patier august     | 2009 PSYCHIATRY                           |
| Finland | Speciality     | 60 number.patier august      | 2009 ANAESTHESIOLOGY                      |
| Finland | Speciality     | 141 number.patier august     | 2009 ADOLESCENT AND CHILD PSYCHIATRY      |
| Finland | Speciality     | 266 number.patier august     | 2009 CHILD NEUROLOGY                      |
| Finland | Speciality     | 168 number.patier august     | 2009 PHONIATRICS                          |
| Finland | Speciality     | 43 number.patier august      | 2009 ONCOLOGY AND RADIOLOGY               |
| Finland | Process        | 6620 number.patier august    | 2009 Orthopaedics                         |
| Finland | Process        | 1088 number.patier august    | 2009 Hand surgery                         |
| Finland | Process        | 994 number.patier august     | 2009 Surgery                              |
| Finland | Process        | 1050 number.patier august    | 2009 Gastroenterological surgery          |
| Finland | Process        | 985 number.patier august     | 2009 Urology                              |
| Finland | Process        | 485 number.patier august     | 2009 Vascular surgery                     |
| Finland | Process        | 426 number.patier august     | 2009 Plastic surgery                      |
| Finland | Process        | 311 number.patier august     | 2009 Paediatric surgery                   |
| Finland | Process        | 642 number.patier august     | 2009 General surgery                      |
| Finland | Process        | 27 number.patier august      | 2009 Cardiothoracic surgery               |
| Finland | Internal.medic | 608 number.patier august     | 2009 Cardiology                           |
| Finland | Internal.medic | 434 number.patier august     | 2009 Internal medicine                    |
| Finland | Internal.medic | 304 number.patier august     | 2009 Gastroenterology (internal medicine) |
| Finland | Internal.medic | 183 number.patier august     | 2009 Endocrinology (internal medicine)    |
| Finland | Internal.medic | 173 number.patier august     | 2009 Rheumatology                         |
| Finland | Internal.medic | 26 number.patier august      | 2009 Nephrology                           |
| Finland | Internal.medic | 19 number.patier august      | 2009 Haematology                          |
| Finland | Internal.medic | 4 number.patier august       | 2009 Geriatrics (internal medicine)       |
| Finland | Internal.medic | 9 number.patier august       | 2009 Infectious diseases                  |
| Finland | Internal.medic | 50 number.patier august      | 2009 Allergology (internal medicine)      |
| Finland | Speciality     | 10949 number.patier december | 2009 SURGERY                              |
| Finland | Speciality     | 2166 number.patier december  | 2009 OPHTHALMOLOGY                        |

|         |                |                             |                                           |
|---------|----------------|-----------------------------|-------------------------------------------|
| Finland | Speciality     | 1172 number.patien december | 2009 OTORHINOLARYNGOLOGY                  |
| Finland | Speciality     | 1292 number.patien december | 2009 INTERNAL MEDICINE                    |
| Finland | Speciality     | 534 number.patien december  | 2009 NEUROLOGY                            |
| Finland | Speciality     | 633 number.patien december  | 2009 OTHER                                |
| Finland | Speciality     | 361 number.patien december  | 2009 ORAL AND MAXILLOFACIAL SURGERY       |
| Finland | Speciality     | 248 number.patien december  | 2009 DERMATOLOGY AND VENEREOLOGY          |
| Finland | Speciality     | 769 number.patien december  | 2009 OBSTETRICS AND GYNAECOLOGY           |
| Finland | Speciality     | 255 number.patien december  | 2009 RESPIRATORY MEDICINE                 |
| Finland | Speciality     | 303 number.patien december  | 2009 PAEDIATRICS                          |
| Finland | Speciality     | 204 number.patien december  | 2009 NEUROSURGERY                         |
| Finland | Speciality     | 256 number.patien december  | 2009 PSYCHIATRY                           |
| Finland | Speciality     | 20 number.patien december   | 2009 ANAESTHESIOLOGY                      |
| Finland | Speciality     | 124 number.patien december  | 2009 ADOLESCENT AND CHILD PSYCHIATRY      |
| Finland | Speciality     | 166 number.patien december  | 2009 CHILD NEUROLOGY                      |
| Finland | Speciality     | 136 number.patien december  | 2009 PHONiatrics                          |
| Finland | Speciality     | 26 number.patien december   | 2009 ONCOLOGY AND RADIOLOGY               |
| Finland | Process        | 6648 number.patien december | 2009 Orthopaedics                         |
| Finland | Process        | 788 number.patien december  | 2009 Hand surgery                         |
| Finland | Process        | 792 number.patien december  | 2009 Surgery                              |
| Finland | Process        | 655 number.patien december  | 2009 Gastroenterological surgery          |
| Finland | Process        | 560 number.patien december  | 2009 Urology                              |
| Finland | Process        | 433 number.patien december  | 2009 Vascular surgery                     |
| Finland | Process        | 292 number.patien december  | 2009 Plastic surgery                      |
| Finland | Process        | 237 number.patien december  | 2009 Paediatric surgery                   |
| Finland | Process        | 521 number.patien december  | 2009 General surgery                      |
| Finland | Process        | 23 number.patien december   | 2009 Cardiothoracic surgery               |
| Finland | Internal.medic | 484 number.patien december  | 2009 Cardiology                           |
| Finland | Internal.medic | 340 number.patien december  | 2009 Internal medicine                    |
| Finland | Internal.medic | 185 number.patien december  | 2009 Gastroenterology (internal medicine) |
| Finland | Internal.medic | 141 number.patien december  | 2009 Endocrinology (internal medicine)    |
| Finland | Internal.medic | 83 number.patien december   | 2009 Rheumatology                         |
| Finland | Internal.medic | 12 number.patien december   | 2009 Nephrology                           |
| Finland | Internal.medic | 15 number.patien december   | 2009 Haematology                          |



|         |                |      |               |          |      |                                 |
|---------|----------------|------|---------------|----------|------|---------------------------------|
| Finland | Internal.medic | 12   | number.patien | december | 2009 | Geriatrics (internal medicine)  |
| Finland | Internal.medic | 8    | number.patien | december | 2009 | Infectious diseases             |
| Finland | Internal.medic | 12   | number.patien | december | 2009 | Allergology (internal medicine) |
| Finland | Speciality     | 8731 | number.patien | april    | 2010 | SURGERY                         |
| Finland | Speciality     | 1854 | number.patien | april    | 2010 | OPHTHALMOLOGY                   |
| Finland | Speciality     | 1351 | number.patien | april    | 2010 | OTORHINOLARYNGOLOGY             |
| Finland | Speciality     | 1219 | number.patien | april    | 2010 | INTERNAL MEDICINE               |
| Finland | Speciality     | 652  | number.patien | april    | 2010 | NEUROLOGY                       |
| Finland | Speciality     | 627  | number.patien | april    | 2010 | OTHER                           |
| Finland | Speciality     | 312  | number.patien | april    | 2010 | ORAL AND MAXILLOFACIAL SURGERY  |
| Finland | Speciality     | 266  | number.patien | april    | 2010 | DERMATOLOGY AND VENEREOLOGY     |
| Finland | Speciality     | 817  | number.patien | april    | 2010 | OBSTETRICS AND GYNAECOLOGY      |
| Finland | Speciality     | 386  | number.patien | april    | 2010 | RESPIRATORY MEDICINE            |
| Finland | Speciality     | 327  | number.patien | april    | 2010 | PAEDIATRICS                     |
| Finland | Speciality     | 225  | number.patien | april    | 2010 | NEUROSURGERY                    |
| Finland | Speciality     | 111  | number.patien | april    | 2010 | PSYCHIATRY                      |
| Finland | Speciality     | 43   | number.patien | april    | 2010 | ANAESTHESIOLOGY                 |
| Finland | Speciality     | 125  | number.patien | april    | 2010 | ADOLESCENT AND CHILD PSYCHIATRY |
| Finland | Speciality     | 133  | number.patien | april    | 2010 | CHILD NEUROLOGY                 |
| Finland | Speciality     | 135  | number.patien | april    | 2010 | PHONiatrics                     |
| Finland | Speciality     | 20   | number.patien | april    | 2010 | ONCOLOGY AND RADIOLOGY          |
| Finland | Process        | 4938 | number.patien | april    | 2010 | Orthopaedics                    |
| Finland | Process        | 760  | number.patien | april    | 2010 | Hand surgery                    |
| Finland | Process        | 669  | number.patien | april    | 2010 | Surgery                         |
| Finland | Process        | 593  | number.patien | april    | 2010 | Gastroenterological surgery     |
| Finland | Process        | 591  | number.patien | april    | 2010 | Urology                         |
| Finland | Process        | 240  | number.patien | april    | 2010 | Vascular surgery                |
| Finland | Process        | 263  | number.patien | april    | 2010 | Plastic surgery                 |
| Finland | Process        | 305  | number.patien | april    | 2010 | Paediatric surgery              |
| Finland | Process        | 359  | number.patien | april    | 2010 | General surgery                 |
| Finland | Process        | 13   | number.patien | april    | 2010 | Cardiothoracic surgery          |
| Finland | Internal.medic | 419  | number.patien | april    | 2010 | Cardiology                      |
| Finland | Internal.medic | 411  | number.patien | april    | 2010 | Internal medicine               |

|         |                |       |               |        |                                           |
|---------|----------------|-------|---------------|--------|-------------------------------------------|
| Finland | Internal.medic | 178   | number.patien | april  | 2010 Gastroenterology (internal medicine) |
| Finland | Internal.medic | 122   | number.patien | april  | 2010 Endocrinology (internal medicine)    |
| Finland | Internal.medic | 40    | number.patien | april  | 2010 Rheumatology                         |
| Finland | Internal.medic | 15    | number.patien | april  | 2010 Nephrology                           |
| Finland | Internal.medic | 13    | number.patien | april  | 2010 Haematology                          |
| Finland | Internal.medic | 0     | number.patien | april  | 2010 Geriatrics (internal medicine)       |
| Finland | Internal.medic | 9     | number.patien | april  | 2010 Infectious diseases                  |
| Finland | Internal.medic | 12    | number.patien | april  | 2010 Allergology (internal medicine)      |
| Finland | Speciality     | 13533 | number.patien | august | 2010 SURGERY                              |
| Finland | Speciality     | 2874  | number.patien | august | 2010 OPHTHALMOLOGY                        |
| Finland | Speciality     | 2078  | number.patien | august | 2010 OTORHINOLARYNGOLOGY                  |
| Finland | Speciality     | 2157  | number.patien | august | 2010 INTERNAL MEDICINE                    |
| Finland | Speciality     | 1033  | number.patien | august | 2010 NEUROLOGY                            |
| Finland | Speciality     | 854   | number.patien | august | 2010 OTHER                                |
| Finland | Speciality     | 554   | number.patien | august | 2010 ORAL AND MAXILLOFACIAL SURGERY       |
| Finland | Speciality     | 401   | number.patien | august | 2010 DERMATOLOGY AND VENEREOLOGY          |
| Finland | Speciality     | 1344  | number.patien | august | 2010 OBSTETRICS AND GYNAECOLOGY           |
| Finland | Speciality     | 522   | number.patien | august | 2010 RESPIRATORY MEDICINE                 |
| Finland | Speciality     | 496   | number.patien | august | 2010 PAEDIATRICS                          |
| Finland | Speciality     | 325   | number.patien | august | 2010 NEUROSURGERY                         |
| Finland | Speciality     | 118   | number.patien | august | 2010 PSYCHIATRY                           |
| Finland | Speciality     | 83    | number.patien | august | 2010 ANAESTHESIOLOGY                      |
| Finland | Speciality     | 166   | number.patien | august | 2010 ADOLESCENT AND CHILD PSYCHIATRY      |
| Finland | Speciality     | 235   | number.patien | august | 2010 CHILD NEUROLOGY                      |
| Finland | Speciality     | 158   | number.patien | august | 2010 PHONiatrics                          |
| Finland | Speciality     | 31    | number.patien | august | 2010 ONCOLOGY AND RADIOLOGY               |
| Finland | Process        | 6954  | number.patien | august | 2010 Orthopaedics                         |
| Finland | Process        | 1105  | number.patien | august | 2010 Hand surgery                         |
| Finland | Process        | 1658  | number.patien | august | 2010 Surgery                              |
| Finland | Process        | 1125  | number.patien | august | 2010 Gastroenterological surgery          |
| Finland | Process        | 872   | number.patien | august | 2010 Urology                              |
| Finland | Process        | 568   | number.patien | august | 2010 Vascular surgery                     |
| Finland | Process        | 469   | number.patien | august | 2010 Plastic surgery                      |

|         |                |      |               |          |                                           |
|---------|----------------|------|---------------|----------|-------------------------------------------|
| Finland | Process        | 319  | number.patier | augost   | 2010 Paediatric surgery                   |
| Finland | Process        | 445  | number.patier | augost   | 2010 General surgery                      |
| Finland | Process        | 18   | number.patier | augost   | 2010 Cardiothoracic surgery               |
| Finland | Internal.medic | 700  | number.patier | augost   | 2010 Cardiology                           |
| Finland | Internal.medic | 726  | number.patier | augost   | 2010 Internal medicine                    |
| Finland | Internal.medic | 318  | number.patier | augost   | 2010 Gastroenterology (internal medicine) |
| Finland | Internal.medic | 159  | number.patier | augost   | 2010 Endocrinology (internal medicine)    |
| Finland | Internal.medic | 123  | number.patier | augost   | 2010 Rheumatology                         |
| Finland | Internal.medic | 32   | number.patier | augost   | 2010 Nephrology                           |
| Finland | Internal.medic | 22   | number.patier | augost   | 2010 Haematology                          |
| Finland | Internal.medic | 0    | number.patier | augost   | 2010 Geriatrics (internal medicine)       |
| Finland | Internal.medic | 7    | number.patier | augost   | 2010 Infectious diseases                  |
| Finland | Internal.medic | 70   | number.patier | augost   | 2010 Allergology (internal medicine)      |
| Finland | Speciality     | 7631 | number.patier | december | 2010 SURGERY                              |
| Finland | Speciality     | 2021 | number.patier | december | 2010 OPHTHALMOLOGY                        |
| Finland | Speciality     | 1228 | number.patier | december | 2010 OTORHINOLARYNGOLOGY                  |
| Finland | Speciality     | 995  | number.patier | december | 2010 INTERNAL MEDICINE                    |
| Finland | Speciality     | 864  | number.patier | december | 2010 NEUROLOGY                            |
| Finland | Speciality     | 377  | number.patier | december | 2010 OTHER                                |
| Finland | Speciality     | 397  | number.patier | december | 2010 ORAL AND MAXILLOFACIAL SURGERY       |
| Finland | Speciality     | 276  | number.patier | december | 2010 DERMATOLOGY AND VENEREOLOGY          |
| Finland | Speciality     | 848  | number.patier | december | 2010 OBSTETRICS AND GYNAECOLOGY           |
| Finland | Speciality     | 204  | number.patier | december | 2010 RESPIRATORY MEDICINE                 |
| Finland | Speciality     | 354  | number.patier | december | 2010 PAEDIATRICS                          |
| Finland | Speciality     | 197  | number.patier | december | 2010 NEUROSURGERY                         |
| Finland | Speciality     | 74   | number.patier | december | 2010 PSYCHIATRY                           |
| Finland | Speciality     | 54   | number.patier | december | 2010 ANAESTHESIOLOGY                      |
| Finland | Speciality     | 29   | number.patier | december | 2010 ADOLESCENT AND CHILD PSYCHIATRY      |
| Finland | Speciality     | 196  | number.patier | december | 2010 CHILD NEUROLOGY                      |
| Finland | Speciality     | 113  | number.patier | december | 2010 PHONiatrics                          |
| Finland | Speciality     | 48   | number.patier | december | 2010 ONCOLOGY AND RADIOLOGY               |
| Finland | Process        | 3437 | number.patier | december | 2010 Orthopaedics                         |
| Finland | Process        | 655  | number.patier | december | 2010 Hand surgery                         |

|         |                |                             |                                           |
|---------|----------------|-----------------------------|-------------------------------------------|
| Finland | Process        | 1150 number.patien december | 2010 Surgery                              |
| Finland | Process        | 622 number.patien december  | 2010 Gastroenterological surgery          |
| Finland | Process        | 301 number.patien december  | 2010 Urology                              |
| Finland | Process        | 700 number.patien december  | 2010 Vascular surgery                     |
| Finland | Process        | 335 number.patien december  | 2010 Plastic surgery                      |
| Finland | Process        | 130 number.patien december  | 2010 Paediatric surgery                   |
| Finland | Process        | 284 number.patien december  | 2010 General surgery                      |
| Finland | Process        | 17 number.patien december   | 2010 Cardiothoracic surgery               |
| Finland | Internal.medic | 244 number.patien december  | 2010 Cardiology                           |
| Finland | Internal.medic | 363 number.patien december  | 2010 Internal medicine                    |
| Finland | Internal.medic | 147 number.patien december  | 2010 Gastroenterology (internal medicine) |
| Finland | Internal.medic | 85 number.patien december   | 2010 Endocrinology (internal medicine)    |
| Finland | Internal.medic | 77 number.patien december   | 2010 Rheumatology                         |
| Finland | Internal.medic | 13 number.patien december   | 2010 Nephrology                           |
| Finland | Internal.medic | 12 number.patien december   | 2010 Haematology                          |
| Finland | Internal.medic | 0 number.patien december    | 2010 Geriatrics (internal medicine)       |
| Finland | Internal.medic | 3 number.patien december    | 2010 Infectious diseases                  |
| Finland | Internal.medic | 51 number.patien december   | 2010 Allergology (internal medicine)      |
| Finland | Speciality     | 6127 number.patien april    | 2011 SURGERY                              |
| Finland | Speciality     | 2163 number.patien april    | 2011 OPHTHALMOLOGY                        |
| Finland | Speciality     | 1060 number.patien april    | 2011 OTORHINOLARYNGOLOGY                  |
| Finland | Speciality     | 958 number.patien april     | 2011 INTERNAL MEDICINE                    |
| Finland | Speciality     | 627 number.patien april     | 2011 NEUROLOGY                            |
| Finland | Speciality     | 472 number.patien april     | 2011 OTHER                                |
| Finland | Speciality     | 322 number.patien april     | 2011 ORAL AND MAXILLOFACIAL SURGERY       |
| Finland | Speciality     | 266 number.patien april     | 2011 DERMATOLOGY AND VENEREOLOGY          |
| Finland | Speciality     | 855 number.patien april     | 2011 OBSTETRICS AND GYNAECOLOGY           |
| Finland | Speciality     | 300 number.patien april     | 2011 RESPIRATORY MEDICINE                 |
| Finland | Speciality     | 297 number.patien april     | 2011 PAEDIATRICS                          |
| Finland | Speciality     | 306 number.patien april     | 2011 NEUROSURGERY                         |
| Finland | Speciality     | 77 number.patien april      | 2011 PSYCHIATRY                           |
| Finland | Speciality     | 27 number.patien april      | 2011 ANAESTHESIOLOGY                      |
| Finland | Speciality     | 18 number.patien april      | 2011 ADOLESCENT AND CHILD PSYCHIATRY      |

|         |                |                           |                                           |
|---------|----------------|---------------------------|-------------------------------------------|
| Finland | Speciality     | 166 number.patien april   | 2011 CHILD NEUROLOGY                      |
| Finland | Speciality     | 100 number.patien april   | 2011 PHONiatrics                          |
| Finland | Speciality     | 30 number.patien april    | 2011 ONCOLOGY AND RADIOLOGY               |
| Finland | Process        | 3114 number.patien april  | 2011 Orthopaedics                         |
| Finland | Process        | 674 number.patien april   | 2011 Hand surgery                         |
| Finland | Process        | 464 number.patien april   | 2011 Surgery                              |
| Finland | Process        | 449 number.patien april   | 2011 Gastroenterological surgery          |
| Finland | Process        | 279 number.patien april   | 2011 Urology                              |
| Finland | Process        | 387 number.patien april   | 2011 Vascular surgery                     |
| Finland | Process        | 302 number.patien april   | 2011 Plastic surgery                      |
| Finland | Process        | 129 number.patien april   | 2011 Paediatric surgery                   |
| Finland | Process        | 319 number.patien april   | 2011 General surgery                      |
| Finland | Process        | 10 number.patien april    | 2011 Cardiothoracic surgery               |
| Finland | Internal.medic | 385 number.patien april   | 2011 Cardiology                           |
| Finland | Internal.medic | 272 number.patien april   | 2011 Internal medicine                    |
| Finland | Internal.medic | 146 number.patien april   | 2011 Gastroenterology (internal medicine) |
| Finland | Internal.medic | 73 number.patien april    | 2011 Endocrinology (internal medicine)    |
| Finland | Internal.medic | 49 number.patien april    | 2011 Rheumatology                         |
| Finland | Internal.medic | 11 number.patien april    | 2011 Nephrology                           |
| Finland | Internal.medic | 15 number.patien april    | 2011 Haematology                          |
| Finland | Internal.medic | 1 number.patien april     | 2011 Geriatrics (internal medicine)       |
| Finland | Internal.medic | 0 number.patien april     | 2011 Infectious diseases                  |
| Finland | Internal.medic | 6 number.patien april     | 2011 Allergology (internal medicine)      |
| Finland | Speciality     | 8417 number.patien august | 2011 SURGERY                              |
| Finland | Speciality     | 3162 number.patien august | 2011 OPHTHALMOLOGY                        |
| Finland | Speciality     | 1949 number.patien august | 2011 OTORHINOLARYNGOLOGY                  |
| Finland | Speciality     | 1782 number.patien august | 2011 INTERNAL MEDICINE                    |
| Finland | Speciality     | 709 number.patien august  | 2011 NEUROLOGY                            |
| Finland | Speciality     | 784 number.patien august  | 2011 OTHER                                |
| Finland | Speciality     | 517 number.patien august  | 2011 ORAL AND MAXILLOFACIAL SURGERY       |
| Finland | Speciality     | 382 number.patien august  | 2011 DERMATOLOGY AND VENEREOLOGY          |
| Finland | Speciality     | 934 number.patien august  | 2011 OBSTETRICS AND GYNAECOLOGY           |
| Finland | Speciality     | 450 number.patien august  | 2011 RESPIRATORY MEDICINE                 |

|         |                |                             |                                           |
|---------|----------------|-----------------------------|-------------------------------------------|
| Finland | Speciality     | 220 number.patier august    | 2011 PAEDIATRICS                          |
| Finland | Speciality     | 274 number.patier august    | 2011 NEUROSURGERY                         |
| Finland | Speciality     | 99 number.patier august     | 2011 PSYCHIATRY                           |
| Finland | Speciality     | 53 number.patier august     | 2011 ANAESTHESIOLOGY                      |
| Finland | Speciality     | 58 number.patier august     | 2011 ADOLESCENT AND CHILD PSYCHIATRY      |
| Finland | Speciality     | 249 number.patier august    | 2011 CHILD NEUROLOGY                      |
| Finland | Speciality     | 44 number.patier august     | 2011 PHONIASTRICS                         |
| Finland | Speciality     | 28 number.patier august     | 2011 ONCOLOGY AND RADIOLOGY               |
| Finland | Process        | 4606 number.patier august   | 2011 Orthopaedics                         |
| Finland | Process        | 670 number.patier august    | 2011 Hand surgery                         |
| Finland | Process        | 467 number.patier august    | 2011 Surgery                              |
| Finland | Process        | 720 number.patier august    | 2011 Gastroenterological surgery          |
| Finland | Process        | 514 number.patier august    | 2011 Urology                              |
| Finland | Process        | 573 number.patier august    | 2011 Vascular surgery                     |
| Finland | Process        | 424 number.patier august    | 2011 Plastic surgery                      |
| Finland | Process        | 217 number.patier august    | 2011 Paediatric surgery                   |
| Finland | Process        | 201 number.patier august    | 2011 General surgery                      |
| Finland | Process        | 25 number.patier august     | 2011 Cardiothoracic surgery               |
| Finland | Internal.medic | 737 number.patier august    | 2011 Cardiology                           |
| Finland | Internal.medic | 490 number.patier august    | 2011 Internal medicine                    |
| Finland | Internal.medic | 292 number.patier august    | 2011 Gastroenterology (internal medicine) |
| Finland | Internal.medic | 104 number.patier august    | 2011 Endocrinology (internal medicine)    |
| Finland | Internal.medic | 110 number.patier august    | 2011 Rheumatology                         |
| Finland | Internal.medic | 21 number.patier august     | 2011 Nephrology                           |
| Finland | Internal.medic | 16 number.patier august     | 2011 Haematology                          |
| Finland | Internal.medic | 0 number.patier august      | 2011 Geriatrics (internal medicine)       |
| Finland | Internal.medic | 10 number.patier august     | 2011 Infectious diseases                  |
| Finland | Internal.medic | 2 number.patier august      | 2011 Allergology (internal medicine)      |
| Finland | Speciality     | 3661 number.patier december | 2011 SURGERY                              |
| Finland | Speciality     | 1821 number.patier december | 2011 OPHTHALMOLOGY                        |
| Finland | Speciality     | 709 number.patier december  | 2011 OTORHINOLARYNGOLOGY                  |
| Finland | Speciality     | 980 number.patier december  | 2011 INTERNAL MEDICINE                    |
| Finland | Speciality     | 708 number.patier december  | 2011 NEUROLOGY                            |

|         |                |                             |                                           |
|---------|----------------|-----------------------------|-------------------------------------------|
| Finland | Speciality     | 435 number.patien december  | 2011 OTHER                                |
| Finland | Speciality     | 377 number.patien december  | 2011 ORAL AND MAXILLOFACIAL SURGERY       |
| Finland | Speciality     | 156 number.patien december  | 2011 DERMATOLOGY AND VENEREOLOGY          |
| Finland | Speciality     | 211 number.patien december  | 2011 OBSTETRICS AND GYNAECOLOGY           |
| Finland | Speciality     | 112 number.patien december  | 2011 RESPIRATORY MEDICINE                 |
| Finland | Speciality     | 86 number.patien december   | 2011 PAEDIATRICS                          |
| Finland | Speciality     | 114 number.patien december  | 2011 NEUROSURGERY                         |
| Finland | Speciality     | 89 number.patien december   | 2011 PSYCHIATRY                           |
| Finland | Speciality     | 66 number.patien december   | 2011 ANAESTHESIOLOGY                      |
| Finland | Speciality     | 41 number.patien december   | 2011 ADOLESCENT AND CHILD PSYCHIATRY      |
| Finland | Speciality     | 123 number.patien december  | 2011 CHILD NEUROLOGY                      |
| Finland | Speciality     | 24 number.patien december   | 2011 PHONiatrics                          |
| Finland | Speciality     | 24 number.patien december   | 2011 ONCOLOGY AND RADIOLOGY               |
| Finland | Process        | 1883 number.patien december | 2011 Orthopaedics                         |
| Finland | Process        | 274 number.patien december  | 2011 Hand surgery                         |
| Finland | Process        | 232 number.patien december  | 2011 Surgery                              |
| Finland | Process        | 346 number.patien december  | 2011 Gastroenterological surgery          |
| Finland | Process        | 266 number.patien december  | 2011 Urology                              |
| Finland | Process        | 302 number.patien december  | 2011 Vascular surgery                     |
| Finland | Process        | 230 number.patien december  | 2011 Plastic surgery                      |
| Finland | Process        | 55 number.patien december   | 2011 Paediatric surgery                   |
| Finland | Process        | 58 number.patien december   | 2011 General surgery                      |
| Finland | Process        | 15 number.patien december   | 2011 Cardiothoracic surgery               |
| Finland | Internal.medic | 321 number.patien december  | 2011 Cardiology                           |
| Finland | Internal.medic | 326 number.patien december  | 2011 Internal medicine                    |
| Finland | Internal.medic | 178 number.patien december  | 2011 Gastroenterology (internal medicine) |
| Finland | Internal.medic | 71 number.patien december   | 2011 Endocrinology (internal medicine)    |
| Finland | Internal.medic | 45 number.patien december   | 2011 Rheumatology                         |
| Finland | Internal.medic | 12 number.patien december   | 2011 Nephrology                           |
| Finland | Internal.medic | 17 number.patien december   | 2011 Haematology                          |
| Finland | Internal.medic | 0 number.patien december    | 2011 Geriatrics (internal medicine)       |
| Finland | Internal.medic | 10 number.patien december   | 2011 Infectious diseases                  |
| Finland | Internal.medic | 0 number.patien december    | 2011 Allergology (internal medicine)      |

|         |                |                          |                                           |
|---------|----------------|--------------------------|-------------------------------------------|
| Finland | Speciality     | 2925 number.patien april | 2012 SURGERY                              |
| Finland | Speciality     | 1753 number.patien april | 2012 OPHTHALMOLOGY                        |
| Finland | Speciality     | 1088 number.patien april | 2012 OTORHINOLARYNGOLOGY                  |
| Finland | Speciality     | 835 number.patien april  | 2012 INTERNAL MEDICINE                    |
| Finland | Speciality     | 426 number.patien april  | 2012 NEUROLOGY                            |
| Finland | Speciality     | 347 number.patien april  | 2012 OTHER                                |
| Finland | Speciality     | 356 number.patien april  | 2012 ORAL AND MAXILLOFACIAL SURGERY       |
| Finland | Speciality     | 113 number.patien april  | 2012 DERMATOLOGY AND VENEREOLOGY          |
| Finland | Speciality     | 145 number.patien april  | 2012 OBSTETRICS AND GYNAECOLOGY           |
| Finland | Speciality     | 196 number.patien april  | 2012 RESPIRATORY MEDICINE                 |
| Finland | Speciality     | 91 number.patien april   | 2012 PAEDIATRICS                          |
| Finland | Speciality     | 186 number.patien april  | 2012 NEUROSURGERY                         |
| Finland | Speciality     | 53 number.patien april   | 2012 PSYCHIATRY                           |
| Finland | Speciality     | 12 number.patien april   | 2012 ANAESTHESIOLOGY                      |
| Finland | Speciality     | 33 number.patien april   | 2012 ADOLESCENT AND CHILD PSYCHIATRY      |
| Finland | Speciality     | 47 number.patien april   | 2012 CHILD NEUROLOGY                      |
| Finland | Speciality     | 28 number.patien april   | 2012 PHONiatrics                          |
| Finland | Speciality     | 21 number.patien april   | 2012 ONCOLOGY AND RADIOLOGY               |
| Finland | Process        | 1684 number.patien april | 2012 Orthopaedics                         |
| Finland | Process        | 332 number.patien april  | 2012 Hand surgery                         |
| Finland | Process        | 159 number.patien april  | 2012 Surgery                              |
| Finland | Process        | 140 number.patien april  | 2012 Gastroenterological surgery          |
| Finland | Process        | 234 number.patien april  | 2012 Urology                              |
| Finland | Process        | 109 number.patien april  | 2012 Vascular surgery                     |
| Finland | Process        | 166 number.patien april  | 2012 Plastic surgery                      |
| Finland | Process        | 58 number.patien april   | 2012 Paediatric surgery                   |
| Finland | Process        | 33 number.patien april   | 2012 General surgery                      |
| Finland | Process        | 10 number.patien april   | 2012 Cardiothoracic surgery               |
| Finland | Internal.medic | 482 number.patien april  | 2012 Cardiology                           |
| Finland | Internal.medic | 136 number.patien april  | 2012 Internal medicine                    |
| Finland | Internal.medic | 78 number.patien april   | 2012 Gastroenterology (internal medicine) |
| Finland | Internal.medic | 71 number.patien april   | 2012 Endocrinology (internal medicine)    |
| Finland | Internal.medic | 42 number.patien april   | 2012 Rheumatology                         |



|         |                |      |                      |      |                                 |
|---------|----------------|------|----------------------|------|---------------------------------|
| Finland | Internal.medic | 8    | number.patier april  | 2012 | Nephrology                      |
| Finland | Internal.medic | 13   | number.patier april  | 2012 | Haematology                     |
| Finland | Internal.medic | 0    | number.patier april  | 2012 | Geriatrics (internal medicine)  |
| Finland | Internal.medic | 5    | number.patier april  | 2012 | Infectious diseases             |
| Finland | Internal.medic | 0    | number.patier april  | 2012 | Allergology (internal medicine) |
| Finland | Speciality     | 6052 | number.patier august | 2012 | SURGERY                         |
| Finland | Speciality     | 1755 | number.patier august | 2012 | OPHTHALMOLOGY                   |
| Finland | Speciality     | 1395 | number.patier august | 2012 | OTORHINOLARYNGOLOGY             |
| Finland | Speciality     | 1304 | number.patier august | 2012 | INTERNAL MEDICINE               |
| Finland | Speciality     | 769  | number.patier august | 2012 | NEUROLOGY                       |
| Finland | Speciality     | 612  | number.patier august | 2012 | OTHER                           |
| Finland | Speciality     | 391  | number.patier august | 2012 | ORAL AND MAXILLOFACIAL SURGERY  |
| Finland | Speciality     | 383  | number.patier august | 2012 | DERMATOLOGY AND VENEREOLOGY     |
| Finland | Speciality     | 279  | number.patier august | 2012 | OBSTETRICS AND GYNAECOLOGY      |
| Finland | Speciality     | 273  | number.patier august | 2012 | RESPIRATORY MEDICINE            |
| Finland | Speciality     | 209  | number.patier august | 2012 | PAEDIATRICS                     |
| Finland | Speciality     | 193  | number.patier august | 2012 | NEUROSURGERY                    |
| Finland | Speciality     | 109  | number.patier august | 2012 | PSYCHIATRY                      |
| Finland | Speciality     | 77   | number.patier august | 2012 | ANAESTHESIOLOGY                 |
| Finland | Speciality     | 66   | number.patier august | 2012 | ADOLESCENT AND CHILD PSYCHIATRY |
| Finland | Speciality     | 63   | number.patier august | 2012 | CHILD NEUROLOGY                 |
| Finland | Speciality     | 52   | number.patier august | 2012 | PHONIATRICS                     |
| Finland | Speciality     | 12   | number.patier august | 2012 | ONCOLOGY AND RADIOLOGY          |
| Finland | Process        | 3062 | number.patier august | 2012 | Orthopaedics                    |
| Finland | Process        | 752  | number.patier august | 2012 | Hand surgery                    |
| Finland | Process        | 513  | number.patier august | 2012 | Surgery                         |
| Finland | Process        | 490  | number.patier august | 2012 | Gastroenterological surgery     |
| Finland | Process        | 462  | number.patier august | 2012 | Urology                         |
| Finland | Process        | 332  | number.patier august | 2012 | Vascular surgery                |
| Finland | Process        | 277  | number.patier august | 2012 | Plastic surgery                 |
| Finland | Process        | 98   | number.patier august | 2012 | Paediatric surgery              |
| Finland | Process        | 62   | number.patier august | 2012 | General surgery                 |
| Finland | Process        | 4    | number.patier august | 2012 | Cardiothoracic surgery          |

|         |                |      |               |          |      |                                      |
|---------|----------------|------|---------------|----------|------|--------------------------------------|
| Finland | Internal.medic | 694  | number.patien | august   | 2012 | Cardiology                           |
| Finland | Internal.medic | 262  | number.patien | august   | 2012 | Internal medicine                    |
| Finland | Internal.medic | 164  | number.patien | august   | 2012 | Gastroenterology (internal medicine) |
| Finland | Internal.medic | 85   | number.patien | august   | 2012 | Endocrinology (internal medicine)    |
| Finland | Internal.medic | 67   | number.patien | august   | 2012 | Rheumatology                         |
| Finland | Internal.medic | 15   | number.patien | august   | 2012 | Nephrology                           |
| Finland | Internal.medic | 11   | number.patien | august   | 2012 | Haematology                          |
| Finland | Internal.medic | 4    | number.patien | august   | 2012 | Geriatrics (internal medicine)       |
| Finland | Internal.medic | 2    | number.patien | august   | 2012 | Infectious diseases                  |
| Finland | Internal.medic | 0    | number.patien | august   | 2012 | Allergology (internal medicine)      |
| Finland | Speciality     | 1910 | number.patien | december | 2012 | SURGERY                              |
| Finland | Speciality     | 721  | number.patien | december | 2012 | OPHTHALMOLOGY                        |
| Finland | Speciality     | 476  | number.patien | december | 2012 | OTORHINOLARYNGOLOGY                  |
| Finland | Speciality     | 511  | number.patien | december | 2012 | INTERNAL MEDICINE                    |
| Finland | Speciality     | 519  | number.patien | december | 2012 | NEUROLOGY                            |
| Finland | Speciality     | 69   | number.patien | december | 2012 | OTHER                                |
| Finland | Speciality     | 174  | number.patien | december | 2012 | ORAL AND MAXILLOFACIAL SURGERY       |
| Finland | Speciality     | 142  | number.patien | december | 2012 | DERMATOLOGY AND VENEREOLOGY          |
| Finland | Speciality     | 200  | number.patien | december | 2012 | OBSTETRICS AND GYNAECOLOGY           |
| Finland | Speciality     | 109  | number.patien | december | 2012 | RESPIRATORY MEDICINE                 |
| Finland | Speciality     | 90   | number.patien | december | 2012 | PAEDIATRICS                          |
| Finland | Speciality     | 50   | number.patien | december | 2012 | NEUROSURGERY                         |
| Finland | Speciality     | 71   | number.patien | december | 2012 | PSYCHIATRY                           |
| Finland | Speciality     | 79   | number.patien | december | 2012 | ANAESTHESIOLOGY                      |
| Finland | Speciality     | 29   | number.patien | december | 2012 | ADOLESCENT AND CHILD PSYCHIATRY      |
| Finland | Speciality     | 27   | number.patien | december | 2012 | CHILD NEUROLOGY                      |
| Finland | Speciality     | 6    | number.patien | december | 2012 | PHONiatrics                          |
| Finland | Speciality     | 10   | number.patien | december | 2012 | ONCOLOGY AND RADIOLOGY               |
| Finland | Process        | 978  | number.patien | december | 2012 | Orthopaedics                         |
| Finland | Process        | 80   | number.patien | december | 2012 | Hand surgery                         |
| Finland | Process        | 203  | number.patien | december | 2012 | Surgery                              |
| Finland | Process        | 174  | number.patien | december | 2012 | Gastroenterological surgery          |
| Finland | Process        | 208  | number.patien | december | 2012 | Urology                              |

|         |                |        |                        |      |                                      |
|---------|----------------|--------|------------------------|------|--------------------------------------|
| Finland | Process        | 120    | number.patien december | 2012 | Vascular surgery                     |
| Finland | Process        | 33     | number.patien december | 2012 | Plastic surgery                      |
| Finland | Process        | 61     | number.patien december | 2012 | Paediatric surgery                   |
| Finland | Process        | 52     | number.patien december | 2012 | General surgery                      |
| Finland | Process        | 1      | number.patien december | 2012 | Cardiothoracic surgery               |
| Finland | Internal.medic | 231    | number.patien december | 2012 | Cardiology                           |
| Finland | Internal.medic | 72     | number.patien december | 2012 | Internal medicine                    |
| Finland | Internal.medic | 104    | number.patien december | 2012 | Gastroenterology (internal medicine) |
| Finland | Internal.medic | 54     | number.patien december | 2012 | Endocrinology (internal medicine)    |
| Finland | Internal.medic | 29     | number.patien december | 2012 | Rheumatology                         |
| Finland | Internal.medic | 15     | number.patien december | 2012 | Nephrology                           |
| Finland | Internal.medic | 4      | number.patien december | 2012 | Haematology                          |
| Finland | Internal.medic | 0      | number.patien december | 2012 | Geriatrics (internal medicine)       |
| Finland | Internal.medic | 2      | number.patien december | 2012 | Infectious diseases                  |
| Finland | Internal.medic | 0      | number.patien december | 2012 | Allergology (internal medicine)      |
| Spain   | Surgical.proce | 92020  | number.patien december | 2003 | General surgery and digestive        |
| Spain   | Surgical.proce | 28997  | number.patien december | 2003 | Gynecology surgery                   |
| Spain   | Surgical.proce | 87786  | number.patien december | 2003 | Ophthalmology surgery                |
| Spain   | Surgical.proce | 33510  | number.patien december | 2003 | Otorhinolaryngology                  |
| Spain   | Surgical.proce | 106033 | number.patien december | 2003 | Traumatology surgery                 |
| Spain   | Surgical.proce | 30325  | number.patien december | 2003 | Urology surgery                      |
| Spain   | Surgical.proce | 2345   | number.patien december | 2003 | Heart surgery                        |
| Spain   | Surgical.proce | 10787  | number.patien december | 2003 | Angiology surgery                    |
| Spain   | Surgical.proce | 5726   | number.patien december | 2003 | Maxillofacial surgery                |
| Spain   | Surgical.proce | 11812  | number.patien december | 2003 | Pediatric surgery                    |
| Spain   | Surgical.proce | 10817  | number.patien december | 2003 | Plastic surgery                      |
| Spain   | Surgical.proce | 998    | number.patien december | 2003 | Thoracic surgery                     |
| Spain   | Surgical.proce | 6714   | number.patien december | 2003 | Neurosurgery                         |
| Spain   | Surgical.proce | 8358   | number.patien december | 2003 | Dermatology surgery                  |
| Spain   | Surgical.proce | 85470  | number.patien december | 2004 | General surgery and digestive        |
| Spain   | Surgical.proce | 28242  | number.patien december | 2004 | Gynecology surgery                   |
| Spain   | Surgical.proce | 85961  | number.patien december | 2004 | Ophthalmology surgery                |
| Spain   | Surgical.proce | 32565  | number.patien december | 2004 | Otorhinolaryngology                  |

|       |                |        |               |          |      |                               |
|-------|----------------|--------|---------------|----------|------|-------------------------------|
| Spain | Surgical.proce | 104321 | number.patien | december | 2004 | Traumatology surgery          |
| Spain | Surgical.proce | 30107  | number.patien | december | 2004 | Urology surgery               |
| Spain | Surgical.proce | 2173   | number.patien | december | 2004 | Heart surgery                 |
| Spain | Surgical.proce | 10857  | number.patien | december | 2004 | Angiology surgery             |
| Spain | Surgical.proce | 5043   | number.patien | december | 2004 | Maxillofacial surgery         |
| Spain | Surgical.proce | 10195  | number.patien | december | 2004 | Pediatric surgery             |
| Spain | Surgical.proce | 11431  | number.patien | december | 2004 | Plastic surgery               |
| Spain | Surgical.proce | 886    | number.patien | december | 2004 | Thoracic surgery              |
| Spain | Surgical.proce | 6568   | number.patien | december | 2004 | Neurosurgery                  |
| Spain | Surgical.proce | 7897   | number.patien | december | 2004 | Dermatology surgery           |
| Spain | Surgical.proce | 77762  | number.patien | december | 2005 | General surgery and digestive |
| Spain | Surgical.proce | 22610  | number.patien | december | 2005 | Gynecology surgery            |
| Spain | Surgical.proce | 77824  | number.patien | december | 2005 | Ophthalmology surgery         |
| Spain | Surgical.proce | 27877  | number.patien | december | 2005 | Otorhinolaryngology           |
| Spain | Surgical.proce | 99368  | number.patien | december | 2005 | Traumatology surgery          |
| Spain | Surgical.proce | 26701  | number.patien | december | 2005 | Urology surgery               |
| Spain | Surgical.proce | 2370   | number.patien | december | 2005 | Heart surgery                 |
| Spain | Surgical.proce | 9976   | number.patien | december | 2005 | Angiology surgery             |
| Spain | Surgical.proce | 6753   | number.patien | december | 2005 | Maxillofacial surgery         |
| Spain | Surgical.proce | 9251   | number.patien | december | 2005 | Pediatric surgery             |
| Spain | Surgical.proce | 11705  | number.patien | december | 2005 | Plastic surgery               |
| Spain | Surgical.proce | 899    | number.patien | december | 2005 | Thoracic surgery              |
| Spain | Surgical.proce | 6025   | number.patien | december | 2005 | Neurosurgery                  |
| Spain | Surgical.proce | 5929   | number.patien | december | 2005 | Dermatology surgery           |
| Spain | Surgical.proce | 71095  | number.patien | june     | 2006 | General surgery and digestive |
| Spain | Surgical.proce | 22365  | number.patien | june     | 2006 | Gynecology surgery            |
| Spain | Surgical.proce | 80438  | number.patien | june     | 2006 | Ophthalmology surgery         |
| Spain | Surgical.proce | 28871  | number.patien | june     | 2006 | Otorhinolaryngology           |
| Spain | Surgical.proce | 101326 | number.patien | june     | 2006 | Traumatology surgery          |
| Spain | Surgical.proce | 25440  | number.patien | june     | 2006 | Urology surgery               |
| Spain | Surgical.proce | 2117   | number.patien | june     | 2006 | Heart surgery                 |
| Spain | Surgical.proce | 10415  | number.patien | june     | 2006 | Angiology surgery             |
| Spain | Surgical.proce | 5299   | number.patien | june     | 2006 | Maxillofacial surgery         |

|       |                |       |               |          |      |                               |
|-------|----------------|-------|---------------|----------|------|-------------------------------|
| Spain | Surgical.proce | 9230  | number.patier | june     | 2006 | Pediatric surgery             |
| Spain | Surgical.proce | 10543 | number.patier | june     | 2006 | Plastic surgery               |
| Spain | Surgical.proce | 904   | number.patier | june     | 2006 | Thoracic surgery              |
| Spain | Surgical.proce | 5774  | number.patier | june     | 2006 | Neurosurgery                  |
| Spain | Surgical.proce | 5888  | number.patier | june     | 2006 | Dermatology surgery           |
| Spain | Surgical.proce | 71137 | number.patier | december | 2006 | General surgery and digestive |
| Spain | Surgical.proce | 21916 | number.patier | december | 2006 | Gynecology surgery            |
| Spain | Surgical.proce | 75342 | number.patier | december | 2006 | Ophthalmology surgery         |
| Spain | Surgical.proce | 26494 | number.patier | december | 2006 | Otorhinolaryngology           |
| Spain | Surgical.proce | 95322 | number.patier | december | 2006 | Traumatology surgery          |
| Spain | Surgical.proce | 24043 | number.patier | december | 2006 | Urology surgery               |
| Spain | Surgical.proce | 2041  | number.patier | december | 2006 | Heart surgery                 |
| Spain | Surgical.proce | 9433  | number.patier | december | 2006 | Angiology surgery             |
| Spain | Surgical.proce | 4652  | number.patier | december | 2006 | Maxillofacial surgery         |
| Spain | Surgical.proce | 9035  | number.patier | december | 2006 | Pediatric surgery             |
| Spain | Surgical.proce | 10558 | number.patier | december | 2006 | Plastic surgery               |
| Spain | Surgical.proce | 871   | number.patier | december | 2006 | Thoracic surgery              |
| Spain | Surgical.proce | 5113  | number.patier | december | 2006 | Neurosurgery                  |
| Spain | Surgical.proce | 6805  | number.patier | december | 2006 | Dermatology surgery           |
| Spain | Surgical.proce | 69208 | number.patier | june     | 2007 | General surgery and digestive |
| Spain | Surgical.proce | 21820 | number.patier | june     | 2007 | Gynecology surgery            |
| Spain | Surgical.proce | 76479 | number.patier | june     | 2007 | Ophthalmology surgery         |
| Spain | Surgical.proce | 28607 | number.patier | june     | 2007 | Otorhinolaryngology           |
| Spain | Surgical.proce | 96655 | number.patier | june     | 2007 | Traumatology surgery          |
| Spain | Surgical.proce | 25527 | number.patier | june     | 2007 | Urology surgery               |
| Spain | Surgical.proce | 2357  | number.patier | june     | 2007 | Heart surgery                 |
| Spain | Surgical.proce | 9323  | number.patier | june     | 2007 | Angiology surgery             |
| Spain | Surgical.proce | 3917  | number.patier | june     | 2007 | Maxillofacial surgery         |
| Spain | Surgical.proce | 8875  | number.patier | june     | 2007 | Pediatric surgery             |
| Spain | Surgical.proce | 10173 | number.patier | june     | 2007 | Plastic surgery               |
| Spain | Surgical.proce | 933   | number.patier | june     | 2007 | Thoracic surgery              |
| Spain | Surgical.proce | 5610  | number.patier | june     | 2007 | Neurosurgery                  |
| Spain | Surgical.proce | 5418  | number.patier | june     | 2007 | Dermatology surgery           |

|       |                |       |               |          |      |                               |
|-------|----------------|-------|---------------|----------|------|-------------------------------|
| Spain | Surgical.proce | 76037 | number.patien | december | 2007 | General surgery and digestive |
| Spain | Surgical.proce | 21771 | number.patien | december | 2007 | Gynecology surgery            |
| Spain | Surgical.proce | 75935 | number.patien | december | 2007 | Ophthalmology surgery         |
| Spain | Surgical.proce | 29315 | number.patien | december | 2007 | Otorhinolaryngology           |
| Spain | Surgical.proce | 96651 | number.patien | december | 2007 | Traumatology surgery          |
| Spain | Surgical.proce | 27736 | number.patien | december | 2007 | Urology surgery               |
| Spain | Surgical.proce | 2589  | number.patien | december | 2007 | Heart surgery                 |
| Spain | Surgical.proce | 9450  | number.patien | december | 2007 | Angiology surgery             |
| Spain | Surgical.proce | 4436  | number.patien | december | 2007 | Maxillofacial surgery         |
| Spain | Surgical.proce | 8550  | number.patien | december | 2007 | Pediatric surgery             |
| Spain | Surgical.proce | 10072 | number.patien | december | 2007 | Plastic surgery               |
| Spain | Surgical.proce | 998   | number.patien | december | 2007 | Thoracic surgery              |
| Spain | Surgical.proce | 5597  | number.patien | december | 2007 | Neurosurgery                  |
| Spain | Surgical.proce | 7105  | number.patien | december | 2007 | Dermatology surgery           |
| Spain | Surgical.proce | 70446 | number.patien | june     | 2008 | General surgery and digestive |
| Spain | Surgical.proce | 21814 | number.patien | june     | 2008 | Gynecology surgery            |
| Spain | Surgical.proce | 75644 | number.patien | june     | 2008 | Ophthalmology surgery         |
| Spain | Surgical.proce | 29459 | number.patien | june     | 2008 | Otorhinolaryngology           |
| Spain | Surgical.proce | 98586 | number.patien | june     | 2008 | Traumatology surgery          |
| Spain | Surgical.proce | 27719 | number.patien | june     | 2008 | Urology surgery               |
| Spain | Surgical.proce | 2687  | number.patien | june     | 2008 | Heart surgery                 |
| Spain | Surgical.proce | 9068  | number.patien | june     | 2008 | Angiology surgery             |
| Spain | Surgical.proce | 4453  | number.patien | june     | 2008 | Maxillofacial surgery         |
| Spain | Surgical.proce | 9451  | number.patien | june     | 2008 | Pediatric surgery             |
| Spain | Surgical.proce | 10067 | number.patien | june     | 2008 | Plastic surgery               |
| Spain | Surgical.proce | 972   | number.patien | june     | 2008 | Thoracic surgery              |
| Spain | Surgical.proce | 5941  | number.patien | june     | 2008 | Neurosurgery                  |
| Spain | Surgical.proce | 6266  | number.patien | june     | 2008 | Dermatology surgery           |
| Spain | Surgical.proce | 71264 | number.patien | december | 2008 | General surgery and digestive |
| Spain | Surgical.proce | 20598 | number.patien | december | 2008 | Gynecology surgery            |
| Spain | Surgical.proce | 71945 | number.patien | december | 2008 | Ophthalmology surgery         |
| Spain | Surgical.proce | 28972 | number.patien | december | 2008 | Otorhinolaryngology           |
| Spain | Surgical.proce | 93755 | number.patien | december | 2008 | Traumatology surgery          |

|       |                |       |               |          |      |                               |
|-------|----------------|-------|---------------|----------|------|-------------------------------|
| Spain | Surgical.proce | 27445 | number.patien | december | 2008 | Urology surgery               |
| Spain | Surgical.proce | 2303  | number.patien | december | 2008 | Heart surgery                 |
| Spain | Surgical.proce | 9270  | number.patien | december | 2008 | Angiology surgery             |
| Spain | Surgical.proce | 4763  | number.patien | december | 2008 | Maxillofacial surgery         |
| Spain | Surgical.proce | 9388  | number.patien | december | 2008 | Pediatric surgery             |
| Spain | Surgical.proce | 10105 | number.patien | december | 2008 | Plastic surgery               |
| Spain | Surgical.proce | 1091  | number.patien | december | 2008 | Thoracic surgery              |
| Spain | Surgical.proce | 5574  | number.patien | december | 2008 | Neurosurgery                  |
| Spain | Surgical.proce | 7922  | number.patien | december | 2008 | Dermatology surgery           |
| Spain | Surgical.proce | 67587 | number.patien | june     | 2009 | General surgery and digestive |
| Spain | Surgical.proce | 21399 | number.patien | june     | 2009 | Gynecology surgery            |
| Spain | Surgical.proce | 73250 | number.patien | june     | 2009 | Ophthalmology surgery         |
| Spain | Surgical.proce | 31522 | number.patien | june     | 2009 | Otorhinolaryngology           |
| Spain | Surgical.proce | 98688 | number.patien | june     | 2009 | Traumatology surgery          |
| Spain | Surgical.proce | 27840 | number.patien | june     | 2009 | Urology surgery               |
| Spain | Surgical.proce | 2072  | number.patien | june     | 2009 | Heart surgery                 |
| Spain | Surgical.proce | 10234 | number.patien | june     | 2009 | Angiology surgery             |
| Spain | Surgical.proce | 5517  | number.patien | june     | 2009 | Maxillofacial surgery         |
| Spain | Surgical.proce | 10178 | number.patien | june     | 2009 | Pediatric surgery             |
| Spain | Surgical.proce | 10349 | number.patien | june     | 2009 | Plastic surgery               |
| Spain | Surgical.proce | 946   | number.patien | june     | 2009 | Thoracic surgery              |
| Spain | Surgical.proce | 5904  | number.patien | june     | 2009 | Neurosurgery                  |
| Spain | Surgical.proce | 8704  | number.patien | june     | 2009 | Dermatology surgery           |
| Spain | Surgical.proce | 72492 | number.patien | december | 2009 | General surgery and digestive |
| Spain | Surgical.proce | 21305 | number.patien | december | 2009 | Gynecology surgery            |
| Spain | Surgical.proce | 70421 | number.patien | december | 2009 | Ophthalmology surgery         |
| Spain | Surgical.proce | 30068 | number.patien | december | 2009 | Otorhinolaryngology           |
| Spain | Surgical.proce | 97187 | number.patien | december | 2009 | Traumatology surgery          |
| Spain | Surgical.proce | 26699 | number.patien | december | 2009 | Urology surgery               |
| Spain | Surgical.proce | 2289  | number.patien | december | 2009 | Heart surgery                 |
| Spain | Surgical.proce | 10118 | number.patien | december | 2009 | Angiology surgery             |
| Spain | Surgical.proce | 5742  | number.patien | december | 2009 | Maxillofacial surgery         |
| Spain | Surgical.proce | 10542 | number.patien | december | 2009 | Pediatric surgery             |

|       |                |        |               |          |      |                               |
|-------|----------------|--------|---------------|----------|------|-------------------------------|
| Spain | Surgical.proce | 10673  | number.patier | december | 2009 | Plastic surgery               |
| Spain | Surgical.proce | 1040   | number.patier | december | 2009 | Thoracic surgery              |
| Spain | Surgical.proce | 6294   | number.patier | december | 2009 | Neurosurgery                  |
| Spain | Surgical.proce | 7596   | number.patier | december | 2009 | Dermatology surgery           |
| Spain | Surgical.proce | 68940  | number.patier | june     | 2010 | General surgery and digestive |
| Spain | Surgical.proce | 21086  | number.patier | june     | 2010 | Gynecology surgery            |
| Spain | Surgical.proce | 77660  | number.patier | june     | 2010 | Ophthalmology surgery         |
| Spain | Surgical.proce | 29782  | number.patier | june     | 2010 | Otorhinolaryngology           |
| Spain | Surgical.proce | 101989 | number.patier | june     | 2010 | Traumatology surgery          |
| Spain | Surgical.proce | 25913  | number.patier | june     | 2010 | Urology surgery               |
| Spain | Surgical.proce | 2544   | number.patier | june     | 2010 | Heart surgery                 |
| Spain | Surgical.proce | 10349  | number.patier | june     | 2010 | Angiology surgery             |
| Spain | Surgical.proce | 5873   | number.patier | june     | 2010 | Maxillofacial surgery         |
| Spain | Surgical.proce | 10720  | number.patier | june     | 2010 | Pediatric surgery             |
| Spain | Surgical.proce | 12017  | number.patier | june     | 2010 | Plastic surgery               |
| Spain | Surgical.proce | 1135   | number.patier | june     | 2010 | Thoracic surgery              |
| Spain | Surgical.proce | 6439   | number.patier | june     | 2010 | Neurosurgery                  |
| Spain | Surgical.proce | 7304   | number.patier | june     | 2010 | Dermatology surgery           |
| Spain | Surgical.proce | 73057  | number.patier | december | 2010 | General surgery and digestive |
| Spain | Surgical.proce | 21521  | number.patier | december | 2010 | Gynecology surgery            |
| Spain | Surgical.proce | 80275  | number.patier | december | 2010 | Ophthalmology surgery         |
| Spain | Surgical.proce | 29544  | number.patier | december | 2010 | Otorhinolaryngology           |
| Spain | Surgical.proce | 100321 | number.patier | december | 2010 | Traumatology surgery          |
| Spain | Surgical.proce | 28005  | number.patier | december | 2010 | Urology surgery               |
| Spain | Surgical.proce | 2592   | number.patier | december | 2010 | Heart surgery                 |
| Spain | Surgical.proce | 11085  | number.patier | december | 2010 | Angiology surgery             |
| Spain | Surgical.proce | 6056   | number.patier | december | 2010 | Maxillofacial surgery         |
| Spain | Surgical.proce | 10234  | number.patier | december | 2010 | Pediatric surgery             |
| Spain | Surgical.proce | 12511  | number.patier | december | 2010 | Plastic surgery               |
| Spain | Surgical.proce | 1109   | number.patier | december | 2010 | Thoracic surgery              |
| Spain | Surgical.proce | 6241   | number.patier | december | 2010 | Neurosurgery                  |
| Spain | Surgical.proce | 9521   | number.patier | december | 2010 | Dermatology surgery           |
| Spain | Surgical.proce | 75914  | number.patier | june     | 2011 | General surgery and digestive |



|       |                |        |               |          |      |                               |
|-------|----------------|--------|---------------|----------|------|-------------------------------|
| Spain | Surgical.proce | 21057  | number.patier | june     | 2011 | Gynecology surgery            |
| Spain | Surgical.proce | 83491  | number.patier | june     | 2011 | Ophthalmology surgery         |
| Spain | Surgical.proce | 31160  | number.patier | june     | 2011 | Otorhinolaryngology           |
| Spain | Surgical.proce | 115328 | number.patier | june     | 2011 | Traumatology surgery          |
| Spain | Surgical.proce | 29360  | number.patier | june     | 2011 | Urology surgery               |
| Spain | Surgical.proce | 4141   | number.patier | june     | 2011 | Heart surgery                 |
| Spain | Surgical.proce | 10033  | number.patier | june     | 2011 | Angiology surgery             |
| Spain | Surgical.proce | 7345   | number.patier | june     | 2011 | Maxillofacial surgery         |
| Spain | Surgical.proce | 10411  | number.patier | june     | 2011 | Pediatric surgery             |
| Spain | Surgical.proce | 13000  | number.patier | june     | 2011 | Plastic surgery               |
| Spain | Surgical.proce | 1568   | number.patier | june     | 2011 | Thoracic surgery              |
| Spain | Surgical.proce | 6733   | number.patier | june     | 2011 | Neurosurgery                  |
| Spain | Surgical.proce | 7866   | number.patier | june     | 2011 | Dermatology surgery           |
| Spain | Surgical.proce | 87152  | number.patier | december | 2011 | General surgery and digestive |
| Spain | Surgical.proce | 22566  | number.patier | december | 2011 | Gynecology surgery            |
| Spain | Surgical.proce | 92541  | number.patier | december | 2011 | Ophthalmology surgery         |
| Spain | Surgical.proce | 32921  | number.patier | december | 2011 | Otorhinolaryngology           |
| Spain | Surgical.proce | 126688 | number.patier | december | 2011 | Traumatology surgery          |
| Spain | Surgical.proce | 31789  | number.patier | december | 2011 | Urology surgery               |
| Spain | Surgical.proce | 2886   | number.patier | december | 2011 | Heart surgery                 |
| Spain | Surgical.proce | 11085  | number.patier | december | 2011 | Angiology surgery             |
| Spain | Surgical.proce | 6664   | number.patier | december | 2011 | Maxillofacial surgery         |
| Spain | Surgical.proce | 11623  | number.patier | december | 2011 | Pediatric surgery             |
| Spain | Surgical.proce | 13786  | number.patier | december | 2011 | Plastic surgery               |
| Spain | Surgical.proce | 1208   | number.patier | december | 2011 | Thoracic surgery              |
| Spain | Surgical.proce | 7719   | number.patier | december | 2011 | Neurosurgery                  |
| Spain | Surgical.proce | 9581   | number.patier | december | 2011 | Dermatology surgery           |
| Spain | Surgical.proce | 101322 | number.patier | june     | 2012 | General surgery and digestive |
| Spain | Surgical.proce | 25029  | number.patier | june     | 2012 | Gynecology surgery            |
| Spain | Surgical.proce | 108134 | number.patier | june     | 2012 | Ophthalmology surgery         |
| Spain | Surgical.proce | 38086  | number.patier | june     | 2012 | Otorhinolaryngology           |
| Spain | Surgical.proce | 152102 | number.patier | june     | 2012 | Traumatology surgery          |
| Spain | Surgical.proce | 38155  | number.patier | june     | 2012 | Urology surgery               |

|       |                |                      |          |                                    |
|-------|----------------|----------------------|----------|------------------------------------|
| Spain | Surgical.proce | 3258 number.patier   | june     | 2012 Heart surgery                 |
| Spain | Surgical.proce | 14120 number.patier  | june     | 2012 Angiology surgery             |
| Spain | Surgical.proce | 7341 number.patier   | june     | 2012 Maxillofacial surgery         |
| Spain | Surgical.proce | 13420 number.patier  | june     | 2012 Pediatric surgery             |
| Spain | Surgical.proce | 14687 number.patier  | june     | 2012 Plastic surgery               |
| Spain | Surgical.proce | 1563 number.patier   | june     | 2012 Thoracic surgery              |
| Spain | Surgical.proce | 8920 number.patier   | june     | 2012 Neurosurgery                  |
| Spain | Surgical.proce | 10774 number.patier  | june     | 2012 Dermatology surgery           |
| Spain | Surgical.proce | 108508 number.patier | december | 2012 General surgery and digestive |
| Spain | Surgical.proce | 25015 number.patier  | december | 2012 Gynecology surgery            |
| Spain | Surgical.proce | 110812 number.patier | december | 2012 Ophthalmology surgery         |
| Spain | Surgical.proce | 38831 number.patier  | december | 2012 Otorhinolaryngology           |
| Spain | Surgical.proce | 166302 number.patier | december | 2012 Traumatology surgery          |
| Spain | Surgical.proce | 39691 number.patier  | december | 2012 Urology surgery               |
| Spain | Surgical.proce | 3277 number.patier   | december | 2012 Heart surgery                 |
| Spain | Surgical.proce | 16481 number.patier  | december | 2012 Angiology surgery             |
| Spain | Surgical.proce | 8296 number.patier   | december | 2012 Maxillofacial surgery         |
| Spain | Surgical.proce | 14550 number.patier  | december | 2012 Pediatric surgery             |
| Spain | Surgical.proce | 15826 number.patier  | december | 2012 Plastic surgery               |
| Spain | Surgical.proce | 1375 number.patier   | december | 2012 Thoracic surgery              |
| Spain | Surgical.proce | 9683 number.patier   | december | 2012 Neurosurgery                  |
| Spain | Surgical.proce | 12748 number.patier  | december | 2012 Dermatology surgery           |
| Spain | Surgical.proce | 110047 number.patier | june     | 2013 General surgery and digestive |
| Spain | Surgical.proce | 24605 number.patier  | june     | 2013 Gynecology surgery            |
| Spain | Surgical.proce | 111832 number.patier | june     | 2013 Ophthalmology surgery         |
| Spain | Surgical.proce | 39807 number.patier  | june     | 2013 Otorhinolaryngology           |
| Spain | Surgical.proce | 173006 number.patier | june     | 2013 Traumatology surgery          |
| Spain | Surgical.proce | 39716 number.patier  | june     | 2013 Urology surgery               |
| Spain | Surgical.proce | 3379 number.patier   | june     | 2013 Heart surgery                 |
| Spain | Surgical.proce | 16482 number.patier  | june     | 2013 Angiology surgery             |
| Spain | Surgical.proce | 8016 number.patier   | june     | 2013 Maxillofacial surgery         |
| Spain | Surgical.proce | 15196 number.patier  | june     | 2013 Pediatric surgery             |
| Spain | Surgical.proce | 16108 number.patier  | june     | 2013 Plastic surgery               |

|       |                |        |               |          |      |                               |
|-------|----------------|--------|---------------|----------|------|-------------------------------|
| Spain | Surgical.proce | 1684   | number.patien | june     | 2013 | Thoracic surgery              |
| Spain | Surgical.proce | 10062  | number.patien | june     | 2013 | Neurosurgery                  |
| Spain | Surgical.proce | 13666  | number.patien | june     | 2013 | Dermatology surgery           |
| Spain | Surgical.proce | 105863 | number.patien | december | 2013 | General surgery and digestive |
| Spain | Surgical.proce | 24492  | number.patien | december | 2013 | Gynecology surgery            |
| Spain | Surgical.proce | 114102 | number.patien | december | 2013 | Ophthalmology surgery         |
| Spain | Surgical.proce | 37801  | number.patien | december | 2013 | Otorhinolaryngology           |
| Spain | Surgical.proce | 156017 | number.patien | december | 2013 | Traumatology surgery          |
| Spain | Surgical.proce | 37665  | number.patien | december | 2013 | Urology surgery               |
| Spain | Surgical.proce | 3460   | number.patien | december | 2013 | Heart surgery                 |
| Spain | Surgical.proce | 14338  | number.patien | december | 2013 | Angiology surgery             |
| Spain | Surgical.proce | 7272   | number.patien | december | 2013 | Maxillofacial surgery         |
| Spain | Surgical.proce | 14365  | number.patien | december | 2013 | Pediatric surgery             |
| Spain | Surgical.proce | 17099  | number.patien | december | 2013 | Plastic surgery               |
| Spain | Surgical.proce | 1525   | number.patien | december | 2013 | Thoracic surgery              |
| Spain | Surgical.proce | 9701   | number.patien | december | 2013 | Neurosurgery                  |
| Spain | Surgical.proce | 15636  | number.patien | december | 2013 | Dermatology surgery           |
| Spain | Surgical.proce | 100201 | number.patien | june     | 2014 | General surgery and digestive |
| Spain | Surgical.proce | 22159  | number.patien | june     | 2014 | Gynecology surgery            |
| Spain | Surgical.proce | 116528 | number.patien | june     | 2014 | Ophthalmology surgery         |
| Spain | Surgical.proce | 39608  | number.patien | june     | 2014 | Otorhinolaryngology           |
| Spain | Surgical.proce | 157653 | number.patien | june     | 2014 | Traumatology surgery          |
| Spain | Surgical.proce | 35398  | number.patien | june     | 2014 | Urology surgery               |
| Spain | Surgical.proce | 3175   | number.patien | june     | 2014 | Heart surgery                 |
| Spain | Surgical.proce | 13509  | number.patien | june     | 2014 | Angiology surgery             |
| Spain | Surgical.proce | 7457   | number.patien | june     | 2014 | Maxillofacial surgery         |
| Spain | Surgical.proce | 14809  | number.patien | june     | 2014 | Pediatric surgery             |
| Spain | Surgical.proce | 15783  | number.patien | june     | 2014 | Plastic surgery               |
| Spain | Surgical.proce | 1504   | number.patien | june     | 2014 | Thoracic surgery              |
| Spain | Surgical.proce | 9964   | number.patien | june     | 2014 | Neurosurgery                  |
| Spain | Surgical.proce | 14257  | number.patien | june     | 2014 | Dermatology surgery           |
| Spain | Surgical.proce | 95908  | number.patien | december | 2014 | General surgery and digestive |
| Spain | Surgical.proce | 21731  | number.patien | december | 2014 | Gynecology surgery            |

|       |                |        |               |          |      |                               |
|-------|----------------|--------|---------------|----------|------|-------------------------------|
| Spain | Surgical.proce | 109596 | number.patien | december | 2014 | Ophthalmology surgery         |
| Spain | Surgical.proce | 34615  | number.patien | december | 2014 | Otorhinolaryngology           |
| Spain | Surgical.proce | 137955 | number.patien | december | 2014 | Traumatology surgery          |
| Spain | Surgical.proce | 34722  | number.patien | december | 2014 | Urology surgery               |
| Spain | Surgical.proce | 3039   | number.patien | december | 2014 | Heart surgery                 |
| Spain | Surgical.proce | 13404  | number.patien | december | 2014 | Angiology surgery             |
| Spain | Surgical.proce | 7457   | number.patien | december | 2014 | Maxillofacial surgery         |
| Spain | Surgical.proce | 13150  | number.patien | december | 2014 | Pediatric surgery             |
| Spain | Surgical.proce | 14085  | number.patien | december | 2014 | Plastic surgery               |
| Spain | Surgical.proce | 1421   | number.patien | december | 2014 | Thoracic surgery              |
| Spain | Surgical.proce | 9794   | number.patien | december | 2014 | Neurosurgery                  |
| Spain | Surgical.proce | 15043  | number.patien | december | 2014 | Dermatology surgery           |
| Spain | Surgical.proce | 95083  | number.patien | june     | 2015 | General surgery and digestive |
| Spain | Surgical.proce | 21150  | number.patien | june     | 2015 | Gynecology surgery            |
| Spain | Surgical.proce | 109934 | number.patien | june     | 2015 | Ophthalmology surgery         |
| Spain | Surgical.proce | 37010  | number.patien | june     | 2015 | Otorhinolaryngology           |
| Spain | Surgical.proce | 146025 | number.patien | june     | 2015 | Traumatology surgery          |
| Spain | Surgical.proce | 35823  | number.patien | june     | 2015 | Urology surgery               |
| Spain | Surgical.proce | 2933   | number.patien | june     | 2015 | Heart surgery                 |
| Spain | Surgical.proce | 12446  | number.patien | june     | 2015 | Angiology surgery             |
| Spain | Surgical.proce | 8120   | number.patien | june     | 2015 | Maxillofacial surgery         |
| Spain | Surgical.proce | 12911  | number.patien | june     | 2015 | Pediatric surgery             |
| Spain | Surgical.proce | 14584  | number.patien | june     | 2015 | Plastic surgery               |
| Spain | Surgical.proce | 1481   | number.patien | june     | 2015 | Thoracic surgery              |
| Spain | Surgical.proce | 10282  | number.patien | june     | 2015 | Neurosurgery                  |
| Spain | Surgical.proce | 14382  | number.patien | june     | 2015 | Dermatology surgery           |
| Spain | Surgical.proce | 100298 | number.patien | december | 2015 | General surgery and digestive |
| Spain | Surgical.proce | 22047  | number.patien | december | 2015 | Gynecology surgery            |
| Spain | Surgical.proce | 116548 | number.patien | december | 2015 | Ophthalmology surgery         |
| Spain | Surgical.proce | 37891  | number.patien | december | 2015 | Otorhinolaryngology           |
| Spain | Surgical.proce | 149159 | number.patien | december | 2015 | Traumatology surgery          |
| Spain | Surgical.proce | 38139  | number.patien | december | 2015 | Urology surgery               |
| Spain | Surgical.proce | 3496   | number.patien | december | 2015 | Heart surgery                 |

|       |                 |       |               |          |      |                              |
|-------|-----------------|-------|---------------|----------|------|------------------------------|
| Spain | Surgical.proce  | 13824 | number.patien | december | 2015 | Angiology surgery            |
| Spain | Surgical.proce  | 8577  | number.patien | december | 2015 | Maxillofacial surgery        |
| Spain | Surgical.proce  | 15279 | number.patien | december | 2015 | Pediatric surgery            |
| Spain | Surgical.proce  | 15583 | number.patien | december | 2015 | Plastic surgery              |
| Spain | Surgical.proce  | 1447  | number.patien | december | 2015 | Thoracic surgery             |
| Spain | Surgical.proce  | 10437 | number.patien | december | 2015 | Neurosurgery                 |
| Spain | Surgical.proce  | 16705 | number.patien | december | 2015 | Dermatology surgery          |
| Spain | Surgical.specia | 71504 | number.patien | december | 2003 | Cataract surgery             |
| Spain | Surgical.specia | 25659 | number.patien | december | 2003 | Inguinal and femoral hernia  |
| Spain | Surgical.specia | 9563  | number.patien | december | 2003 | Hip replacement in-patient   |
| Spain | Surgical.specia | 14675 | number.patien | december | 2003 | Arthroscopy                  |
| Spain | Surgical.specia | 14157 | number.patien | december | 2003 | Varices                      |
| Spain | Surgical.specia | 9849  | number.patien | december | 2003 | Cholecystectomy              |
| Spain | Surgical.specia | 17003 | number.patien | december | 2003 | Hallux valgus                |
| Spain | Surgical.specia | 9841  | number.patien | december | 2003 | Adenotonsillectomy           |
| Spain | Surgical.specia | 5122  | number.patien | december | 2003 | Benign prostatic hypertrophy |
| Spain | Surgical.specia | 6593  | number.patien | december | 2003 | Pilonidal cyst               |
| Spain | Surgical.specia | 8378  | number.patien | december | 2003 | Carpal tunnel                |
| Spain | Surgical.specia | 70237 | number.patien | december | 2004 | Cataract surgery             |
| Spain | Surgical.specia | 24478 | number.patien | december | 2004 | Inguinal and femoral hernia  |
| Spain | Surgical.specia | 9644  | number.patien | december | 2004 | Hip replacement in-patient   |
| Spain | Surgical.specia | 15485 | number.patien | december | 2004 | Arthroscopy                  |
| Spain | Surgical.specia | 14286 | number.patien | december | 2004 | Varices                      |
| Spain | Surgical.specia | 10944 | number.patien | december | 2004 | Cholecystectomy              |
| Spain | Surgical.specia | 15098 | number.patien | december | 2004 | Hallux valgus                |
| Spain | Surgical.specia | 10681 | number.patien | december | 2004 | Adenotonsillectomy           |
| Spain | Surgical.specia | 4771  | number.patien | december | 2004 | Benign prostatic hypertrophy |
| Spain | Surgical.specia | 5647  | number.patien | december | 2004 | Pilonidal cyst               |
| Spain | Surgical.specia | 9740  | number.patien | december | 2004 | Carpal tunnel                |
| Spain | Surgical.specia | 64434 | number.patien | december | 2005 | Cataract surgery             |
| Spain | Surgical.specia | 23208 | number.patien | december | 2005 | Inguinal and femoral hernia  |
| Spain | Surgical.specia | 9588  | number.patien | december | 2005 | Hip replacement in-patient   |
| Spain | Surgical.specia | 15411 | number.patien | december | 2005 | Arthroscopy                  |

|       |                 |       |               |          |      |                              |
|-------|-----------------|-------|---------------|----------|------|------------------------------|
| Spain | Surgical.specia | 12039 | number.patien | december | 2005 | Varices                      |
| Spain | Surgical.specia | 10193 | number.patien | december | 2005 | Cholecystectomy              |
| Spain | Surgical.specia | 13891 | number.patien | december | 2005 | Hallux valgus                |
| Spain | Surgical.specia | 9721  | number.patien | december | 2005 | Adenotonsillectomy           |
| Spain | Surgical.specia | 4472  | number.patien | december | 2005 | Benign prostatic hypertrophy |
| Spain | Surgical.specia | 5080  | number.patien | december | 2005 | Pilonidal cyst               |
| Spain | Surgical.specia | 9203  | number.patien | december | 2005 | Carpal tunnel                |
| Spain | Surgical.specia | 62948 | number.patien | june     | 2006 | Cataract surgery             |
| Spain | Surgical.specia | 19726 | number.patien | june     | 2006 | Inguinal and femoral hernia  |
| Spain | Surgical.specia | 9091  | number.patien | june     | 2006 | Hip replacement in-patient   |
| Spain | Surgical.specia | 15965 | number.patien | june     | 2006 | Arthroscopy                  |
| Spain | Surgical.specia | 12114 | number.patien | june     | 2006 | Varices                      |
| Spain | Surgical.specia | 10150 | number.patien | june     | 2006 | Cholecystectomy              |
| Spain | Surgical.specia | 14331 | number.patien | june     | 2006 | Hallux valgus                |
| Spain | Surgical.specia | 9629  | number.patien | june     | 2006 | Adenotonsillectomy           |
| Spain | Surgical.specia | 4745  | number.patien | june     | 2006 | Benign prostatic hypertrophy |
| Spain | Surgical.specia | 4157  | number.patien | june     | 2006 | Pilonidal cyst               |
| Spain | Surgical.specia | 10341 | number.patien | june     | 2006 | Carpal tunnel                |
| Spain | Surgical.specia | 59641 | number.patien | december | 2006 | Cataract surgery             |
| Spain | Surgical.specia | 19582 | number.patien | december | 2006 | Inguinal and femoral hernia  |
| Spain | Surgical.specia | 8908  | number.patien | december | 2006 | Hip replacement in-patient   |
| Spain | Surgical.specia | 15316 | number.patien | december | 2006 | Arthroscopy                  |
| Spain | Surgical.specia | 11170 | number.patien | december | 2006 | Varices                      |
| Spain | Surgical.specia | 10085 | number.patien | december | 2006 | Cholecystectomy              |
| Spain | Surgical.specia | 13206 | number.patien | december | 2006 | Hallux valgus                |
| Spain | Surgical.specia | 8678  | number.patien | december | 2006 | Adenotonsillectomy           |
| Spain | Surgical.specia | 4181  | number.patien | december | 2006 | Benign prostatic hypertrophy |
| Spain | Surgical.specia | 4180  | number.patien | december | 2006 | Pilonidal cyst               |
| Spain | Surgical.specia | 8880  | number.patien | december | 2006 | Carpal tunnel                |
| Spain | Surgical.specia | 58682 | number.patien | june     | 2007 | Cataract surgery             |
| Spain | Surgical.specia | 19196 | number.patien | june     | 2007 | Inguinal and femoral hernia  |
| Spain | Surgical.specia | 8291  | number.patien | june     | 2007 | Hip replacement in-patient   |
| Spain | Surgical.specia | 15551 | number.patien | june     | 2007 | Arthroscopy                  |

|       |                 |       |               |          |      |                              |
|-------|-----------------|-------|---------------|----------|------|------------------------------|
| Spain | Surgical.specia | 11173 | number.patien | june     | 2007 | Varices                      |
| Spain | Surgical.specia | 9658  | number.patien | june     | 2007 | Cholecystectomy              |
| Spain | Surgical.specia | 12513 | number.patien | june     | 2007 | Hallux valgus                |
| Spain | Surgical.specia | 10109 | number.patien | june     | 2007 | Adenotonsillectomy           |
| Spain | Surgical.specia | 4332  | number.patien | june     | 2007 | Benign prostatic hypertrophy |
| Spain | Surgical.specia | 4090  | number.patien | june     | 2007 | Pilonidal cyst               |
| Spain | Surgical.specia | 8974  | number.patien | june     | 2007 | Carpal tunnel                |
| Spain | Surgical.specia | 59437 | number.patien | december | 2007 | Cataract surgery             |
| Spain | Surgical.specia | 19970 | number.patien | december | 2007 | Inguinal and femoral hernia  |
| Spain | Surgical.specia | 8561  | number.patien | december | 2007 | Hip replacement in-patient   |
| Spain | Surgical.specia | 15664 | number.patien | december | 2007 | Arthroscopy                  |
| Spain | Surgical.specia | 10783 | number.patien | december | 2007 | Varices                      |
| Spain | Surgical.specia | 9852  | number.patien | december | 2007 | Cholecystectomy              |
| Spain | Surgical.specia | 12477 | number.patien | december | 2007 | Hallux valgus                |
| Spain | Surgical.specia | 9604  | number.patien | december | 2007 | Adenotonsillectomy           |
| Spain | Surgical.specia | 4284  | number.patien | december | 2007 | Benign prostatic hypertrophy |
| Spain | Surgical.specia | 4179  | number.patien | december | 2007 | Pilonidal cyst               |
| Spain | Surgical.specia | 8125  | number.patien | december | 2007 | Carpal tunnel                |
| Spain | Surgical.specia | 60548 | number.patien | june     | 2008 | Cataract surgery             |
| Spain | Surgical.specia | 18624 | number.patien | june     | 2008 | Inguinal and femoral hernia  |
| Spain | Surgical.specia | 7956  | number.patien | june     | 2008 | Hip replacement in-patient   |
| Spain | Surgical.specia | 15665 | number.patien | june     | 2008 | Arthroscopy                  |
| Spain | Surgical.specia | 10051 | number.patien | june     | 2008 | Varices                      |
| Spain | Surgical.specia | 9673  | number.patien | june     | 2008 | Cholecystectomy              |
| Spain | Surgical.specia | 11680 | number.patien | june     | 2008 | Hallux valgus                |
| Spain | Surgical.specia | 10084 | number.patien | june     | 2008 | Adenotonsillectomy           |
| Spain | Surgical.specia | 4208  | number.patien | june     | 2008 | Benign prostatic hypertrophy |
| Spain | Surgical.specia | 4253  | number.patien | june     | 2008 | Pilonidal cyst               |
| Spain | Surgical.specia | 9245  | number.patien | june     | 2008 | Carpal tunnel                |
| Spain | Surgical.specia | 57647 | number.patien | december | 2008 | Cataract surgery             |
| Spain | Surgical.specia | 17664 | number.patien | december | 2008 | Inguinal and femoral hernia  |
| Spain | Surgical.specia | 7990  | number.patien | december | 2008 | Hip replacement in-patient   |
| Spain | Surgical.specia | 15294 | number.patien | december | 2008 | Arthroscopy                  |

|       |                 |                     |          |                                   |
|-------|-----------------|---------------------|----------|-----------------------------------|
| Spain | Surgical.specia | 10382 number.patien | december | 2008 Varices                      |
| Spain | Surgical.specia | 9795 number.patien  | december | 2008 Cholecystectomy              |
| Spain | Surgical.specia | 12556 number.patien | december | 2008 Hallux valgus                |
| Spain | Surgical.specia | 9076 number.patien  | december | 2008 Adenotonsillectomy           |
| Spain | Surgical.specia | 3978 number.patien  | december | 2008 Benign prostatic hypertrophy |
| Spain | Surgical.specia | 3995 number.patien  | december | 2008 Pilonidal cyst               |
| Spain | Surgical.specia | 8012 number.patien  | december | 2008 Carpal tunnel                |
| Spain | Surgical.specia | 57454 number.patien | june     | 2009 Cataract surgery             |
| Spain | Surgical.specia | 16071 number.patien | june     | 2009 Inguinal and femoral hernia  |
| Spain | Surgical.specia | 7587 number.patien  | june     | 2009 Hip replacement in-patient   |
| Spain | Surgical.specia | 16080 number.patien | june     | 2009 Arthroscopy                  |
| Spain | Surgical.specia | 9957 number.patien  | june     | 2009 Varices                      |
| Spain | Surgical.specia | 9806 number.patien  | june     | 2009 Cholecystectomy              |
| Spain | Surgical.specia | 13076 number.patien | june     | 2009 Hallux valgus                |
| Spain | Surgical.specia | 10175 number.patien | june     | 2009 Adenotonsillectomy           |
| Spain | Surgical.specia | 4000 number.patien  | june     | 2009 Benign prostatic hypertrophy |
| Spain | Surgical.specia | 3580 number.patien  | june     | 2009 Pilonidal cyst               |
| Spain | Surgical.specia | 8563 number.patien  | june     | 2009 Carpal tunnel                |
| Spain | Surgical.specia | 56053 number.patien | december | 2009 Cataract surgery             |
| Spain | Surgical.specia | 17490 number.patien | december | 2009 Inguinal and femoral hernia  |
| Spain | Surgical.specia | 8140 number.patien  | december | 2009 Hip replacement in-patient   |
| Spain | Surgical.specia | 15727 number.patien | december | 2009 Arthroscopy                  |
| Spain | Surgical.specia | 10915 number.patien | december | 2009 Varices                      |
| Spain | Surgical.specia | 10322 number.patien | december | 2009 Cholecystectomy              |
| Spain | Surgical.specia | 13021 number.patien | december | 2009 Hallux valgus                |
| Spain | Surgical.specia | 9238 number.patien  | december | 2009 Adenotonsillectomy           |
| Spain | Surgical.specia | 4368 number.patien  | december | 2009 Benign prostatic hypertrophy |
| Spain | Surgical.specia | 3749 number.patien  | december | 2009 Pilonidal cyst               |
| Spain | Surgical.specia | 7928 number.patien  | december | 2009 Carpal tunnel                |
| Spain | Surgical.specia | 60608 number.patien | june     | 2010 Cataract surgery             |
| Spain | Surgical.specia | 16551 number.patien | june     | 2010 Inguinal and femoral hernia  |
| Spain | Surgical.specia | 7634 number.patien  | june     | 2010 Hip replacement in-patient   |
| Spain | Surgical.specia | 16494 number.patien | june     | 2010 Arthroscopy                  |



|       |                 |                     |          |                                   |
|-------|-----------------|---------------------|----------|-----------------------------------|
| Spain | Surgical.specia | 10691 number.patien | june     | 2010 Varices                      |
| Spain | Surgical.specia | 9866 number.patien  | june     | 2010 Cholecystectomy              |
| Spain | Surgical.specia | 13214 number.patien | june     | 2010 Hallux valgus                |
| Spain | Surgical.specia | 9471 number.patien  | june     | 2010 Adenotonsillectomy           |
| Spain | Surgical.specia | 4471 number.patien  | june     | 2010 Benign prostatic hypertrophy |
| Spain | Surgical.specia | 3813 number.patien  | june     | 2010 Pilonidal cyst               |
| Spain | Surgical.specia | 8594 number.patien  | june     | 2010 Carpal tunnel                |
| Spain | Surgical.specia | 64670 number.patien | december | 2010 Cataract surgery             |
| Spain | Surgical.specia | 17525 number.patien | december | 2010 Inguinal and femoral hernia  |
| Spain | Surgical.specia | 8294 number.patien  | december | 2010 Hip replacement in-patient   |
| Spain | Surgical.specia | 16117 number.patien | december | 2010 Arthroscopy                  |
| Spain | Surgical.specia | 11581 number.patien | december | 2010 Varices                      |
| Spain | Surgical.specia | 10102 number.patien | december | 2010 Cholecystectomy              |
| Spain | Surgical.specia | 13243 number.patien | december | 2010 Hallux valgus                |
| Spain | Surgical.specia | 9057 number.patien  | december | 2010 Adenotonsillectomy           |
| Spain | Surgical.specia | 4291 number.patien  | december | 2010 Benign prostatic hypertrophy |
| Spain | Surgical.specia | 3773 number.patien  | december | 2010 Pilonidal cyst               |
| Spain | Surgical.specia | 8559 number.patien  | december | 2010 Carpal tunnel                |
| Spain | Surgical.specia | 68636 number.patien | june     | 2011 Cataract surgery             |
| Spain | Surgical.specia | 17523 number.patien | june     | 2011 Inguinal and femoral hernia  |
| Spain | Surgical.specia | 8397 number.patien  | june     | 2011 Hip replacement in-patient   |
| Spain | Surgical.specia | 18373 number.patien | june     | 2011 Arthroscopy                  |
| Spain | Surgical.specia | 12036 number.patien | june     | 2011 Varices                      |
| Spain | Surgical.specia | 10778 number.patien | june     | 2011 Cholecystectomy              |
| Spain | Surgical.specia | 14999 number.patien | june     | 2011 Hallux valgus                |
| Spain | Surgical.specia | 10487 number.patien | june     | 2011 Adenotonsillectomy           |
| Spain | Surgical.specia | 4568 number.patien  | june     | 2011 Benign prostatic hypertrophy |
| Spain | Surgical.specia | 3860 number.patien  | june     | 2011 Pilonidal cyst               |
| Spain | Surgical.specia | 10421 number.patien | june     | 2011 Carpal tunnel                |
| Spain | Surgical.specia | 74473 number.patien | december | 2011 Cataract surgery             |
| Spain | Surgical.specia | 19735 number.patien | december | 2011 Inguinal and femoral hernia  |
| Spain | Surgical.specia | 10038 number.patien | december | 2011 Hip replacement in-patient   |
| Spain | Surgical.specia | 20012 number.patien | december | 2011 Arthroscopy                  |

|       |                 |       |               |          |      |                              |
|-------|-----------------|-------|---------------|----------|------|------------------------------|
| Spain | Surgical.specia | 13825 | number.patien | december | 2011 | Varices                      |
| Spain | Surgical.specia | 12284 | number.patien | december | 2011 | Cholecystectomy              |
| Spain | Surgical.specia | 16455 | number.patien | december | 2011 | Hallux valgus                |
| Spain | Surgical.specia | 10171 | number.patien | december | 2011 | Adenotonsillectomy           |
| Spain | Surgical.specia | 4927  | number.patien | december | 2011 | Benign prostatic hypertrophy |
| Spain | Surgical.specia | 4220  | number.patien | december | 2011 | Pilonidal cyst               |
| Spain | Surgical.specia | 10250 | number.patien | december | 2011 | Carpal tunnel                |
| Spain | Surgical.specia | 86590 | number.patien | june     | 2012 | Cataract surgery             |
| Spain | Surgical.specia | 20834 | number.patien | june     | 2012 | Inguinal and femoral hernia  |
| Spain | Surgical.specia | 13167 | number.patien | june     | 2012 | Hip replacement in-patient   |
| Spain | Surgical.specia | 20608 | number.patien | june     | 2012 | Arthroscopy                  |
| Spain | Surgical.specia | 14118 | number.patien | june     | 2012 | Varices                      |
| Spain | Surgical.specia | 13152 | number.patien | june     | 2012 | Cholecystectomy              |
| Spain | Surgical.specia | 17153 | number.patien | june     | 2012 | Hallux valgus                |
| Spain | Surgical.specia | 11158 | number.patien | june     | 2012 | Adenotonsillectomy           |
| Spain | Surgical.specia | 5498  | number.patien | june     | 2012 | Benign prostatic hypertrophy |
| Spain | Surgical.specia | 4421  | number.patien | june     | 2012 | Pilonidal cyst               |
| Spain | Surgical.specia | 12330 | number.patien | june     | 2012 | Carpal tunnel                |
| Spain | Surgical.specia | 90599 | number.patien | december | 2012 | Cataract surgery             |
| Spain | Surgical.specia | 24020 | number.patien | december | 2012 | Inguinal and femoral hernia  |
| Spain | Surgical.specia | 12772 | number.patien | december | 2012 | Hip replacement in-patient   |
| Spain | Surgical.specia | 21595 | number.patien | december | 2012 | Arthroscopy                  |
| Spain | Surgical.specia | 15528 | number.patien | december | 2012 | Varices                      |
| Spain | Surgical.specia | 14237 | number.patien | december | 2012 | Cholecystectomy              |
| Spain | Surgical.specia | 17152 | number.patien | december | 2012 | Hallux valgus                |
| Spain | Surgical.specia | 11274 | number.patien | december | 2012 | Adenotonsillectomy           |
| Spain | Surgical.specia | 5985  | number.patien | december | 2012 | Benign prostatic hypertrophy |
| Spain | Surgical.specia | 4964  | number.patien | december | 2012 | Pilonidal cyst               |
| Spain | Surgical.specia | 12438 | number.patien | december | 2012 | Carpal tunnel                |
| Spain | Surgical.specia | 91195 | number.patien | june     | 2013 | Cataract surgery             |
| Spain | Surgical.specia | 23787 | number.patien | june     | 2013 | Inguinal and femoral hernia  |
| Spain | Surgical.specia | 12729 | number.patien | june     | 2013 | Hip replacement in-patient   |
| Spain | Surgical.specia | 21574 | number.patien | june     | 2013 | Arthroscopy                  |

|       |                 |                     |          |                                   |
|-------|-----------------|---------------------|----------|-----------------------------------|
| Spain | Surgical.specia | 14730 number.patien | june     | 2013 Varices                      |
| Spain | Surgical.specia | 14432 number.patien | june     | 2013 Cholecystectomy              |
| Spain | Surgical.specia | 17634 number.patien | june     | 2013 Hallux valgus                |
| Spain | Surgical.specia | 12204 number.patien | june     | 2013 Adenotonsillectomy           |
| Spain | Surgical.specia | 6065 number.patien  | june     | 2013 Benign prostatic hypertrophy |
| Spain | Surgical.specia | 5270 number.patien  | june     | 2013 Pilonidal cyst               |
| Spain | Surgical.specia | 13841 number.patien | june     | 2013 Carpal tunnel                |
| Spain | Surgical.specia | 92293 number.patien | december | 2013 Cataract surgery             |
| Spain | Surgical.specia | 23744 number.patien | december | 2013 Inguinal and femoral hernia  |
| Spain | Surgical.specia | 12296 number.patien | december | 2013 Hip replacement in-patient   |
| Spain | Surgical.specia | 19457 number.patien | december | 2013 Arthroscopy                  |
| Spain | Surgical.specia | 13814 number.patien | december | 2013 Varices                      |
| Spain | Surgical.specia | 13979 number.patien | december | 2013 Cholecystectomy              |
| Spain | Surgical.specia | 15156 number.patien | december | 2013 Hallux valgus                |
| Spain | Surgical.specia | 10539 number.patien | december | 2013 Adenotonsillectomy           |
| Spain | Surgical.specia | 5744 number.patien  | december | 2013 Benign prostatic hypertrophy |
| Spain | Surgical.specia | 5121 number.patien  | december | 2013 Pilonidal cyst               |
| Spain | Surgical.specia | 11517 number.patien | december | 2013 Carpal tunnel                |
| Spain | Surgical.specia | 96164 number.patien | june     | 2014 Cataract surgery             |
| Spain | Surgical.specia | 23577 number.patien | june     | 2014 Inguinal and femoral hernia  |
| Spain | Surgical.specia | 11404 number.patien | june     | 2014 Hip replacement in-patient   |
| Spain | Surgical.specia | 19552 number.patien | june     | 2014 Arthroscopy                  |
| Spain | Surgical.specia | 12037 number.patien | june     | 2014 Varices                      |
| Spain | Surgical.specia | 14161 number.patien | june     | 2014 Cholecystectomy              |
| Spain | Surgical.specia | 14246 number.patien | june     | 2014 Hallux valgus                |
| Spain | Surgical.specia | 11472 number.patien | june     | 2014 Adenotonsillectomy           |
| Spain | Surgical.specia | 5473 number.patien  | june     | 2014 Benign prostatic hypertrophy |
| Spain | Surgical.specia | 4854 number.patien  | june     | 2014 Pilonidal cyst               |
| Spain | Surgical.specia | 12101 number.patien | june     | 2014 Carpal tunnel                |
| Spain | Surgical.specia | 95897 number.patien | december | 2014 Cataract surgery             |
| Spain | Surgical.specia | 24007 number.patien | december | 2014 Inguinal and femoral hernia  |
| Spain | Surgical.specia | 11984 number.patien | december | 2014 Hip replacement in-patient   |
| Spain | Surgical.specia | 17669 number.patien | december | 2014 Arthroscopy                  |

|       |                 |       |               |          |      |                              |
|-------|-----------------|-------|---------------|----------|------|------------------------------|
| Spain | Surgical.specia | 13184 | number.patien | december | 2014 | Varices                      |
| Spain | Surgical.specia | 13257 | number.patien | december | 2014 | Cholecystectomy              |
| Spain | Surgical.specia | 12087 | number.patien | december | 2014 | Hallux valgus                |
| Spain | Surgical.specia | 8899  | number.patien | december | 2014 | Adenotonsillectomy           |
| Spain | Surgical.specia | 5577  | number.patien | december | 2014 | Benign prostatic hypertrophy |
| Spain | Surgical.specia | 5052  | number.patien | december | 2014 | Pilonidal cyst               |
| Spain | Surgical.specia | 10056 | number.patien | december | 2014 | Carpal tunnel                |
| Spain | Surgical.specia | 91394 | number.patien | june     | 2015 | Cataract surgery             |
| Spain | Surgical.specia | 23381 | number.patien | june     | 2015 | Inguinal and femoral hernia  |
| Spain | Surgical.specia | 10921 | number.patien | june     | 2015 | Hip replacement in-patient   |
| Spain | Surgical.specia | 21339 | number.patien | june     | 2015 | Arthroscopy                  |
| Spain | Surgical.specia | 11723 | number.patien | june     | 2015 | Varices                      |
| Spain | Surgical.specia | 13972 | number.patien | june     | 2015 | Cholecystectomy              |
| Spain | Surgical.specia | 14589 | number.patien | june     | 2015 | Hallux valgus                |
| Spain | Surgical.specia | 11133 | number.patien | june     | 2015 | Adenotonsillectomy           |
| Spain | Surgical.specia | 5684  | number.patien | june     | 2015 | Benign prostatic hypertrophy |
| Spain | Surgical.specia | 5026  | number.patien | june     | 2015 | Pilonidal cyst               |
| Spain | Surgical.specia | 11877 | number.patien | june     | 2015 | Carpal tunnel                |
| Spain | Surgical.specia | 91184 | number.patien | december | 2015 | Cataract surgery             |
| Spain | Surgical.specia | 26532 | number.patien | december | 2015 | Inguinal and femoral hernia  |
| Spain | Surgical.specia | 11087 | number.patien | december | 2015 | Hip replacement in-patient   |
| Spain | Surgical.specia | 22030 | number.patien | december | 2015 | Arthroscopy                  |
| Spain | Surgical.specia | 13893 | number.patien | december | 2015 | Varices                      |
| Spain | Surgical.specia | 14013 | number.patien | december | 2015 | Cholecystectomy              |
| Spain | Surgical.specia | 15483 | number.patien | december | 2015 | Hallux valgus                |
| Spain | Surgical.specia | 10695 | number.patien | december | 2015 | Adenotonsillectomy           |
| Spain | Surgical.specia | 5739  | number.patien | december | 2015 | Benign prostatic hypertrophy |
| Spain | Surgical.specia | 5180  | number.patien | december | 2015 | Pilonidal cyst               |
| Spain | Surgical.specia | 12454 | number.patien | december | 2015 | Carpal tunnel                |
| Spain | Outpatient.sp   | 4.645 | number.patien | december | 2006 | Gynecology                   |
| Spain | Outpatient.sp   | 7.624 | number.patien | december | 2006 | Ophthalmology                |
| Spain | Outpatient.sp   | 5.307 | number.patien | december | 2006 | Traumatology                 |
| Spain | Outpatient.sp   | 3.454 | number.patien | december | 2006 | Dermatology                  |

|       |               |       |               |          |      |                               |
|-------|---------------|-------|---------------|----------|------|-------------------------------|
| Spain | Outpatient.sp | 1.984 | number.patier | december | 2006 | Otorhinolaryngology           |
| Spain | Outpatient.sp | 1.385 | number.patier | december | 2006 | Neurology                     |
| Spain | Outpatient.sp | 1.532 | number.patier | december | 2006 | Digestive and General surgery |
| Spain | Outpatient.sp | 1.504 | number.patier | december | 2006 | Urology                       |
| Spain | Outpatient.sp | 1.697 | number.patier | december | 2006 | Digestive                     |
| Spain | Outpatient.sp | 4.939 | number.patier | june     | 2007 | Gynecology                    |
| Spain | Outpatient.sp | 8.134 | number.patier | june     | 2007 | Ophthalmology                 |
| Spain | Outpatient.sp | 5.362 | number.patier | june     | 2007 | Traumatology                  |
| Spain | Outpatient.sp | 4.448 | number.patier | june     | 2007 | Dermatology                   |
| Spain | Outpatient.sp | 2.236 | number.patier | june     | 2007 | Otorhinolaryngology           |
| Spain | Outpatient.sp | 1.442 | number.patier | june     | 2007 | Neurology                     |
| Spain | Outpatient.sp | 1.423 | number.patier | june     | 2007 | Digestive and General surgery |
| Spain | Outpatient.sp | 1.489 | number.patier | june     | 2007 | Urology                       |
| Spain | Outpatient.sp | 1.543 | number.patier | june     | 2007 | Digestive                     |
| Spain | Outpatient.sp | 1.365 | number.patier | june     | 2007 | Cardiology                    |
| Spain | Outpatient.sp | 4.879 | number.patier | december | 2007 | Gynecology                    |
| Spain | Outpatient.sp | 8.272 | number.patier | december | 2007 | Ophthalmology                 |
| Spain | Outpatient.sp | 5.959 | number.patier | december | 2007 | Traumatology                  |
| Spain | Outpatient.sp | 4.252 | number.patier | december | 2007 | Dermatology                   |
| Spain | Outpatient.sp | 2.238 | number.patier | december | 2007 | Otorhinolaryngology           |
| Spain | Outpatient.sp | 1.853 | number.patier | december | 2007 | Neurology                     |
| Spain | Outpatient.sp | 1.529 | number.patier | december | 2007 | Digestive and General surgery |
| Spain | Outpatient.sp | 1.594 | number.patier | december | 2007 | Urology                       |
| Spain | Outpatient.sp | 1.809 | number.patier | december | 2007 | Digestive                     |
| Spain | Outpatient.sp | 1.634 | number.patier | december | 2007 | Cardiology                    |
| Spain | Outpatient.sp | 4.462 | number.patier | june     | 2008 | Gynecology                    |
| Spain | Outpatient.sp | 7.591 | number.patier | june     | 2008 | Ophthalmology                 |
| Spain | Outpatient.sp | 5.734 | number.patier | june     | 2008 | Traumatology                  |
| Spain | Outpatient.sp | 4.563 | number.patier | june     | 2008 | Dermatology                   |
| Spain | Outpatient.sp | 2.223 | number.patier | june     | 2008 | Otorhinolaryngology           |
| Spain | Outpatient.sp | 1.633 | number.patier | june     | 2008 | Neurology                     |
| Spain | Outpatient.sp | 1.401 | number.patier | june     | 2008 | Digestive and General surgery |
| Spain | Outpatient.sp | 1.47  | number.patier | june     | 2008 | Urology                       |

|       |               |       |               |          |                                    |
|-------|---------------|-------|---------------|----------|------------------------------------|
| Spain | Outpatient.sp | 1.672 | number.patien | june     | 2008 Digestive                     |
| Spain | Outpatient.sp | 1.51  | number.patien | june     | 2008 Cardiology                    |
| Spain | Outpatient.sp | 4.304 | number.patien | december | 2008 Gynecology                    |
| Spain | Outpatient.sp | 7.263 | number.patien | december | 2008 Ophthalmology                 |
| Spain | Outpatient.sp | 5.529 | number.patien | december | 2008 Traumatology                  |
| Spain | Outpatient.sp | 4.15  | number.patien | december | 2008 Dermatology                   |
| Spain | Outpatient.sp | 2.039 | number.patien | december | 2008 Otorhinolaryngology           |
| Spain | Outpatient.sp | 1.889 | number.patien | december | 2008 Neurology                     |
| Spain | Outpatient.sp | 1.468 | number.patien | december | 2008 Digestive and General surgery |
| Spain | Outpatient.sp | 1.663 | number.patien | december | 2008 Urology                       |
| Spain | Outpatient.sp | 1.758 | number.patien | december | 2008 Digestive                     |
| Spain | Outpatient.sp | 1.609 | number.patien | december | 2008 Cardiology                    |
| Spain | Outpatient.sp | 4.387 | number.patien | june     | 2009 Gynecology                    |
| Spain | Outpatient.sp | 7.471 | number.patien | june     | 2009 Ophthalmology                 |
| Spain | Outpatient.sp | 6.184 | number.patien | june     | 2009 Traumatology                  |
| Spain | Outpatient.sp | 4.686 | number.patien | june     | 2009 Dermatology                   |
| Spain | Outpatient.sp | 2.25  | number.patien | june     | 2009 Otorhinolaryngology           |
| Spain | Outpatient.sp | 1.708 | number.patien | june     | 2009 Neurology                     |
| Spain | Outpatient.sp | 1.501 | number.patien | june     | 2009 Digestive and General surgery |
| Spain | Outpatient.sp | 1.59  | number.patien | june     | 2009 Urology                       |
| Spain | Outpatient.sp | 1.871 | number.patien | june     | 2009 Digestive                     |
| Spain | Outpatient.sp | 1.441 | number.patien | june     | 2009 Cardiology                    |
| Spain | Outpatient.sp | 3.945 | number.patien | december | 2009 Gynecology                    |
| Spain | Outpatient.sp | 7.636 | number.patien | december | 2009 Ophthalmology                 |
| Spain | Outpatient.sp | 6.335 | number.patien | december | 2009 Traumatology                  |
| Spain | Outpatient.sp | 4.586 | number.patien | december | 2009 Dermatology                   |
| Spain | Outpatient.sp | 2.244 | number.patien | december | 2009 Otorhinolaryngology           |
| Spain | Outpatient.sp | 2.01  | number.patien | december | 2009 Neurology                     |
| Spain | Outpatient.sp | 1.595 | number.patien | december | 2009 Digestive and General surgery |
| Spain | Outpatient.sp | 1.952 | number.patien | december | 2009 Urology                       |
| Spain | Outpatient.sp | 2.223 | number.patien | december | 2009 Digestive                     |
| Spain | Outpatient.sp | 1.708 | number.patien | december | 2009 Cardiology                    |
| Spain | Outpatient.sp | 3.06  | number.patien | june     | 2010 Gynecology                    |

|       |               |                     |          |                                    |
|-------|---------------|---------------------|----------|------------------------------------|
| Spain | Outpatient.sp | 7.48 number.patier  | june     | 2010 Ophthalmology                 |
| Spain | Outpatient.sp | 5.76 number.patier  | june     | 2010 Traumatology                  |
| Spain | Outpatient.sp | 4.29 number.patier  | june     | 2010 Dermatology                   |
| Spain | Outpatient.sp | 2 number.patier     | june     | 2010 Otorhinolaryngology           |
| Spain | Outpatient.sp | 1.75 number.patier  | june     | 2010 Neurology                     |
| Spain | Outpatient.sp | 1.39 number.patier  | june     | 2010 Digestive and General surgery |
| Spain | Outpatient.sp | 1.79 number.patier  | june     | 2010 Urology                       |
| Spain | Outpatient.sp | 1.99 number.patier  | june     | 2010 Digestive                     |
| Spain | Outpatient.sp | 1.53 number.patier  | june     | 2010 Cardiology                    |
| Spain | Outpatient.sp | 2.69 number.patier  | december | 2010 Gynecology                    |
| Spain | Outpatient.sp | 6.448 number.patier | december | 2010 Ophthalmology                 |
| Spain | Outpatient.sp | 5.29 number.patier  | december | 2010 Traumatology                  |
| Spain | Outpatient.sp | 3.691 number.patier | december | 2010 Dermatology                   |
| Spain | Outpatient.sp | 1.79 number.patier  | december | 2010 Otorhinolaryngology           |
| Spain | Outpatient.sp | 1.608 number.patier | december | 2010 Neurology                     |
| Spain | Outpatient.sp | 1.312 number.patier | december | 2010 Digestive and General surgery |
| Spain | Outpatient.sp | 1.586 number.patier | december | 2010 Urology                       |
| Spain | Outpatient.sp | 1.856 number.patier | december | 2010 Digestive                     |
| Spain | Outpatient.sp | 1.491 number.patier | december | 2010 Cardiology                    |
| Spain | Outpatient.sp | 3 number.patier     | june     | 2011 Gynecology                    |
| Spain | Outpatient.sp | 7.49 number.patier  | june     | 2011 Ophthalmology                 |
| Spain | Outpatient.sp | 5.87 number.patier  | june     | 2011 Traumatology                  |
| Spain | Outpatient.sp | 4.68 number.patier  | june     | 2011 Dermatology                   |
| Spain | Outpatient.sp | 2.33 number.patier  | june     | 2011 Otorhinolaryngology           |
| Spain | Outpatient.sp | 1.68 number.patier  | june     | 2011 Neurology                     |
| Spain | Outpatient.sp | 1.63 number.patier  | june     | 2011 Digestive and General surgery |
| Spain | Outpatient.sp | 1.73 number.patier  | june     | 2011 Urology                       |
| Spain | Outpatient.sp | 2.04 number.patier  | june     | 2011 Digestive                     |
| Spain | Outpatient.sp | 1.59 number.patier  | june     | 2011 Cardiology                    |
| Spain | Outpatient.sp | 2.533 number.patier | december | 2011 Gynecology                    |
| Spain | Outpatient.sp | 6.389 number.patier | december | 2011 Ophthalmology                 |
| Spain | Outpatient.sp | 5.602 number.patier | december | 2011 Traumatology                  |
| Spain | Outpatient.sp | 4.388 number.patier | december | 2011 Dermatology                   |

|       |               |       |               |          |      |                               |
|-------|---------------|-------|---------------|----------|------|-------------------------------|
| Spain | Outpatient.sp | 2.011 | number.patien | december | 2011 | Otorhinolaryngology           |
| Spain | Outpatient.sp | 1.72  | number.patien | december | 2011 | Neurology                     |
| Spain | Outpatient.sp | 1.403 | number.patien | december | 2011 | Digestive and General surgery |
| Spain | Outpatient.sp | 1.492 | number.patien | december | 2011 | Urology                       |
| Spain | Outpatient.sp | 1.9   | number.patien | december | 2011 | Digestive                     |
| Spain | Outpatient.sp | 1.353 | number.patien | december | 2011 | Cardiology                    |
| Spain | Outpatient.sp | 2.918 | number.patien | june     | 2012 | Gynecology                    |
| Spain | Outpatient.sp | 7.459 | number.patien | june     | 2012 | Ophthalmology                 |
| Spain | Outpatient.sp | 6.425 | number.patien | june     | 2012 | Traumatology                  |
| Spain | Outpatient.sp | 4.468 | number.patien | june     | 2012 | Dermatology                   |
| Spain | Outpatient.sp | 2.023 | number.patien | june     | 2012 | Otorhinolaryngology           |
| Spain | Outpatient.sp | 1.469 | number.patien | june     | 2012 | Neurology                     |
| Spain | Outpatient.sp | 1.315 | number.patien | june     | 2012 | Digestive and General surgery |
| Spain | Outpatient.sp | 1.412 | number.patien | june     | 2012 | Urology                       |
| Spain | Outpatient.sp | 1.903 | number.patien | june     | 2012 | Digestive                     |
| Spain | Outpatient.sp | 1.485 | number.patien | june     | 2012 | Cardiology                    |
| Spain | Outpatient.sp | 4.388 | number.patien | december | 2012 | Gynecology                    |
| Spain | Outpatient.sp | 9.203 | number.patien | december | 2012 | Ophthalmology                 |
| Spain | Outpatient.sp | 8.577 | number.patien | december | 2012 | Traumatology                  |
| Spain | Outpatient.sp | 6.588 | number.patien | december | 2012 | Dermatology                   |
| Spain | Outpatient.sp | 2.698 | number.patien | december | 2012 | Otorhinolaryngology           |
| Spain | Outpatient.sp | 2.514 | number.patien | december | 2012 | Neurology                     |
| Spain | Outpatient.sp | 1.96  | number.patien | december | 2012 | Digestive and General surgery |
| Spain | Outpatient.sp | 2.146 | number.patien | december | 2012 | Urology                       |
| Spain | Outpatient.sp | 2.951 | number.patien | december | 2012 | Digestive                     |
| Spain | Outpatient.sp | 2.118 | number.patien | december | 2012 | Cardiology                    |
| Spain | Outpatient.sp | 3.772 | number.patien | june     | 2013 | Gynecology                    |
| Spain | Outpatient.sp | 8.686 | number.patien | june     | 2013 | Ophthalmology                 |
| Spain | Outpatient.sp | 7.978 | number.patien | june     | 2013 | Traumatology                  |
| Spain | Outpatient.sp | 6.518 | number.patien | june     | 2013 | Dermatology                   |
| Spain | Outpatient.sp | 2.699 | number.patien | june     | 2013 | Otorhinolaryngology           |
| Spain | Outpatient.sp | 2.093 | number.patien | june     | 2013 | Neurology                     |
| Spain | Outpatient.sp | 1.646 | number.patien | june     | 2013 | Digestive and General surgery |



|       |               |                     |          |                                    |
|-------|---------------|---------------------|----------|------------------------------------|
| Spain | Outpatient.sp | 2.132 number.patier | june     | 2013 Urology                       |
| Spain | Outpatient.sp | 2.659 number.patier | june     | 2013 Digestive                     |
| Spain | Outpatient.sp | 1.939 number.patier | june     | 2013 Cardiology                    |
| Spain | Outpatient.sp | 3.2 number.patier   | december | 2013 Gynecology                    |
| Spain | Outpatient.sp | 7.7 number.patier   | december | 2013 Ophthalmology                 |
| Spain | Outpatient.sp | 7.3 number.patier   | december | 2013 Traumatology                  |
| Spain | Outpatient.sp | 5.4 number.patier   | december | 2013 Dermatology                   |
| Spain | Outpatient.sp | 2.3 number.patier   | december | 2013 Otorhinolaryngology           |
| Spain | Outpatient.sp | 2.1 number.patier   | december | 2013 Neurology                     |
| Spain | Outpatient.sp | 1.5 number.patier   | december | 2013 Digestive and General surgery |
| Spain | Outpatient.sp | 1.7 number.patier   | december | 2013 Urology                       |
| Spain | Outpatient.sp | 2.2 number.patier   | december | 2013 Digestive                     |
| Spain | Outpatient.sp | 1.6 number.patier   | december | 2013 Cardiology                    |
| Spain | Outpatient.sp | 2.98 number.patier  | june     | 2014 Gynecology                    |
| Spain | Outpatient.sp | 7.9 number.patier   | june     | 2014 Ophthalmology                 |
| Spain | Outpatient.sp | 8.03 number.patier  | june     | 2014 Traumatology                  |
| Spain | Outpatient.sp | 5.98 number.patier  | june     | 2014 Dermatology                   |
| Spain | Outpatient.sp | 2.73 number.patier  | june     | 2014 Otorhinolaryngology           |
| Spain | Outpatient.sp | 2.06 number.patier  | june     | 2014 Neurology                     |
| Spain | Outpatient.sp | 1.48 number.patier  | june     | 2014 Digestive and General surgery |
| Spain | Outpatient.sp | 1.82 number.patier  | june     | 2014 Urology                       |
| Spain | Outpatient.sp | 2.48 number.patier  | june     | 2014 Digestive                     |
| Spain | Outpatient.sp | 1.83 number.patier  | june     | 2014 Cardiology                    |
| Spain | Outpatient.sp | 2.48 number.patier  | december | 2014 Gynecology                    |
| Spain | Outpatient.sp | 6.87 number.patier  | december | 2014 Ophthalmology                 |
| Spain | Outpatient.sp | 7.04 number.patier  | december | 2014 Traumatology                  |
| Spain | Outpatient.sp | 4.8 number.patier   | december | 2014 Dermatology                   |
| Spain | Outpatient.sp | 2.23 number.patier  | december | 2014 Otorhinolaryngology           |
| Spain | Outpatient.sp | 1.79 number.patier  | december | 2014 Neurology                     |
| Spain | Outpatient.sp | 1.39 number.patier  | december | 2014 Digestive and General surgery |
| Spain | Outpatient.sp | 1.5 number.patier   | december | 2014 Urology                       |
| Spain | Outpatient.sp | 2.22 number.patier  | december | 2014 Digestive                     |
| Spain | Outpatient.sp | 1.56 number.patier  | december | 2014 Cardiology                    |

|       |               |      |               |          |      |                               |
|-------|---------------|------|---------------|----------|------|-------------------------------|
| Spain | Outpatient.sp | 2.67 | number.patien | june     | 2015 | Gynecology                    |
| Spain | Outpatient.sp | 7.23 | number.patien | june     | 2015 | Ophthalmology                 |
| Spain | Outpatient.sp | 7.81 | number.patien | june     | 2015 | Traumatology                  |
| Spain | Outpatient.sp | 5.52 | number.patien | june     | 2015 | Dermatology                   |
| Spain | Outpatient.sp | 2.9  | number.patien | june     | 2015 | Otorhinolaryngology           |
| Spain | Outpatient.sp | 1.83 | number.patien | june     | 2015 | Neurology                     |
| Spain | Outpatient.sp | 1.39 | number.patien | june     | 2015 | Digestive and General surgery |
| Spain | Outpatient.sp | 1.72 | number.patien | june     | 2015 | Urology                       |
| Spain | Outpatient.sp | 2.62 | number.patien | june     | 2015 | Digestive                     |
| Spain | Outpatient.sp | 1.64 | number.patien | june     | 2015 | Cardiology                    |
| Spain | Outpatient.sp | 2.73 | number.patien | december | 2015 | Gynecology                    |
| Spain | Outpatient.sp | 7.22 | number.patien | december | 2015 | Ophthalmology                 |
| Spain | Outpatient.sp | 7.47 | number.patien | december | 2015 | Traumatology                  |
| Spain | Outpatient.sp | 5.43 | number.patien | december | 2015 | Dermatology                   |
| Spain | Outpatient.sp | 2.56 | number.patien | december | 2015 | Otorhinolaryngology           |
| Spain | Outpatient.sp | 1.89 | number.patien | december | 2015 | Neurology                     |
| Spain | Outpatient.sp | 1.47 | number.patien | december | 2015 | Digestive and General surgery |
| Spain | Outpatient.sp | 1.73 | number.patien | december | 2015 | Urology                       |
| Spain | Outpatient.sp | 2.47 | number.patien | december | 2015 | Digestive                     |
| Spain | Outpatient.sp | 1.54 | number.patien | december | 2015 | Cardiology                    |
